# Supplementary material for: Synthesis of substituted Z-styrenes by Hiyama-type coupling of oxasilacycloalkenes: application to the synthesis of a 1-benzoxocane
Source: publisher site journal article supplement (doi:10.3762/bjoc.13.209), 2017-10-11

# Supporting Information

for

## Synthesis of substituted Z-styrenes by Hiyama-type coupling of oxasilacycloalkenes: application to the synthesis of a 1-benzoxocane

James R. Vyvyan,\* Courtney A. Engles, Scott L. Bray, Erik D. Wold, Christopher L. Porter, Mikhail O. Konev  
Address: Department of Chemistry, Western Washington University, 516 High Street, Bellingham, WA 98225, USA

Email: James R. Vyvyan - [James.Vyvyan@wwu.edu](mailto:James.Vyvyan@wwu.edu)

\*Corresponding author

**Full experimental details and copies of  $^1\text{H}$  and  $^{13}\text{C}$  NMR spectra for all new compounds**

### Contents

|                         |        |
|-------------------------|--------|
| Experimental procedures | S2–S10 |
| Copies of NMR spectra   |        |
| Alkynol <b>7</b>        | S11    |
| Siloxane <b>8a</b>      | S12    |
| Siloxane <b>8b</b>      | S13    |
| Siloxane <b>8c</b>      | S14    |
| Alcohol <b>10</b>       | S15    |
| Alcohol <b>11</b>       | S16    |
| Alcohol <b>13</b>       | S17    |
| Alcohol <b>15</b>       | S18    |
| Iodide <b>16</b>        | S19    |
| Alcohol <b>17</b>       | S20    |
| Iodide <b>18</b>        | S21    |
| Alcohol <b>19</b>       | S22    |
| Alcohol <b>21</b>       | S23    |
| Alcohol <b>23</b>       | S24    |
| Ether <b>24</b>         | S25    |
| Alcohol <b>25</b>       | S26    |
| Benzoxocane <b>26</b>   | S27    |

## Experimental

All reactions involving air- or moisture-sensitive materials were done in oven-dried glassware under a dry argon atmosphere. CH<sub>2</sub>Cl<sub>2</sub>, Et<sub>2</sub>O, THF and toluene were dried by passing through a column of activated alumina under nitrogen immediately before use. 1,4-Dioxane was distilled from sodium/benzophenone ketyl under argon. Acetone was dried by stirring over boron oxide overnight followed by distillation. Chromatography was carried out using hand-packed columns of silica gel (230–400 mesh). <sup>1</sup>H and <sup>13</sup>C NMR spectra were acquired on Varian Mercury (300 MHz) or Inova (500 MHz) spectrometers. <sup>1</sup>H NMR chemical shifts are referenced to tetramethylsilane (TMS) at 0.00 ppm. <sup>13</sup>C NMR chemical shifts are referenced to CDCl<sub>3</sub> at 77.0 ppm.

**2-Methyl-5-heptyn-2-ol (7).** 5-Iodo-2-pentyne<sup>1</sup> (6.00 g, 30.9 mmol) was dissolved in dry Et<sub>2</sub>O (300 mL) and the solution was cooled in a dry ice–isopropyl alcohol bath. *tert*-Butyllithium (41.5 mL, 1.64 M in pentane, 68.1 mmol, 2.20 equiv) was added slowly. After 20 min, dry acetone (6.80 mL, 5.38 g, 92.7 mmol, 3.0 equiv) was added dropwise. After warming to room temperature, the white suspension was quenched by careful addition of NH<sub>4</sub>Cl solution (~100 mL). The layers were separated and the aqueous layer was extracted with Et<sub>2</sub>O (3 × 40 mL). The combined organic layers were washed with sat. NH<sub>4</sub>Cl solution and brine. The organic layer was dried over Na<sub>2</sub>SO<sub>4</sub>, filtered, and concentrated by rotary evaporation. MPLC (3:1 hexanes: EtOAc) gave **7** as a colorless oil (2.04 g, 16.2 mmol, 52%). R<sub>f</sub> = 0.35 (3:1 hexanes:EtOAc); IR (neat, diamond ATR): 3392 br, 2922, 2857, 2100 w, 1468, 1447, 1377, 1218, 1134, 927, 909 cm<sup>-1</sup>; <sup>1</sup>H NMR (CDCl<sub>3</sub>, 300 MHz): δ = 2.25 (tq, *J* = 7.5, 2.5 Hz, 2H), 2.35 (br s, 1H, OH), 1.78 (t, *J* = 2.5 Hz, 3H), 1.22 (s, 6H); <sup>13</sup>C NMR (CDCl<sub>3</sub>, 75 MHz): δ = 79.2, 76.2, 70.6, 42.0, 28.9, 13.8, 3.3; *Anal.* Calcd for C<sub>8</sub>H<sub>14</sub>O: C, 76.14; H, 11.18. Found: C, 76.50; H, 11.35.

---

<sup>1</sup> Tauber, J.; Rudolph, K.; Rohr, M.; Erkel, G.; Opatz, T. *Eur. J. Org. Chem.*, **2015**, 3587–3608.

### Alternative preparation of **7**

A solution of MeMgBr (23.0 mL, 3.0 M in Et<sub>2</sub>O, 69.0 mmol, 1.1 equiv) was diluted with additional Et<sub>2</sub>O (23 mL). A solution of 5-heptyn-2-one<sup>2</sup> (6.69 g, 61.0 mmol, 1.0 equiv) in dry Et<sub>2</sub>O (10 mL) was added to dropwise through an addition funnel such that the mixture refluxed gently. After 1 h at room temperature, half-saturated NH<sub>4</sub>Cl solution was carefully added and the mixture transferred to a separatory funnel. The layers were separated and the aqueous layer extracted with ether (3 × 30 mL). The combined organic layers were washed with sat. NH<sub>4</sub>Cl solution and brine. The organic layer was dried over Na<sub>2</sub>SO<sub>4</sub>, filtered, and concentrated by rotary evaporation. The residue was distilled to provide **7** (5.35 g, 42.4 mmol, 70%) as a colorless oil (bp = 69-72 °C at 9 mmHg). For spectral characterization, *vide supra*.

**2,2,3-Trimethyl-5,6-dihydro-2H-1,2-oxasiline (8a).** A 2-necked 100-mL round-bottomed flask was charged with 3-pentyn-1-ol (**5**) (6.92 mL, 6.23 g, 71.0 mmol) and 1,1,3,3-tetramethyldisilazane (26.6 mL, 20.0 g, 157 mmol). The solution was heated in an 80 °C oil bath for 2.5 h. The flask was removed from the oil bath and the excess 1,1,3,3-tetramethyldisilazane was removed by distillation. The residue was taken up in CH<sub>2</sub>Cl<sub>2</sub> (75 mL) and cooled in an ice bath. [Cp\*Ru(NCCH<sub>3</sub>)<sub>3</sub>]PF<sub>6</sub> (0.757 g, 1.50 mmol, 2.0 mol %) was added and the mixture was stirred overnight at room temperature. The mixture was diluted with Et<sub>2</sub>O and filtered through a plug of Florisil with additional Et<sub>2</sub>O. The filtrate was concentrated by rotary evaporation and the residue purified by Kugelrohr distillation (bp = 155-165 °C at 1 atm) to yield **8a** as a colorless oil (4.52 g, 31.8 mmol, 45%). IR (neat, diamond ATR): 2956, 2924, 2854, 1613, 1252, 1144, 1087, 1046, 864, 822, 779, 664 cm<sup>-1</sup>; <sup>1</sup>H NMR (CDCl<sub>3</sub>, 500 MHz): δ = 6.37 (tq, *J* = 4.0, 1.5 Hz, 1H), 3.91 (t, *J* = 5.5 Hz, 2 H), 2.22 (tdq, *J* = 5.5, 4.0, 1.5 Hz, 2H), 1.71 (dt, *J* = 1.5, 1.5 Hz, 3H), 0.18 (s, 6H); <sup>13</sup>C NMR (CDCl<sub>3</sub>, 125 MHz): δ = 140.1, 134.9, 62.0, 30.7, 20.3, -2.0; HRMS (CI, NH<sub>3</sub>): calcd for C<sub>7</sub>H<sub>18</sub>NOSi (M+NH<sub>4</sub>): 160.1158; found: 160.1161. *Anal.* Calcd for C<sub>7</sub>H<sub>14</sub>OSi: C, 59.09; H, 9.92. Found: C, 58.84; H, 9.73.

<sup>2</sup> Barbot, F.; Mesnard, D.; Miginiac, L. *Org. Prep. Proc. Int.*, **1978**, 10, 261-6.

**2,2,3-Trimethyl-2,5,6,7-tetrahydro-1,2-oxasilepine (8b).** The procedure for the preparation of **8a** was followed using 4-hexyn-1-ol (**6**)<sup>3</sup> (0.308 g, 3.14 mmol), 1,1,3,3-tetramethyldisilazane (1.42 mL, 1.07 g, 8.00 mmol), and [Cp\*Ru(NCCH<sub>3</sub>)<sub>3</sub>]PF<sub>6</sub> (0.060 g, 0.119 mmol, 3.8 mol %) gave **8b** (0.4504 g, 2.88 mmol, 93%) as a colorless oil after distillation (bp = 78-92 °C at 100 mmHg). IR (neat, diamond ATR): 2926, 2871, 1619, 1250, 1136, 1107, 1095, 917, 841, 818, 783, 733, 655 cm<sup>-1</sup>; <sup>1</sup>H NMR (CDCl<sub>3</sub>, 300 MHz): δ = 6.27 (tq, *J* = 4.0, 2.0 Hz, 1H), 3.89 (t, *J* = 5.5 Hz, 2 H), 2.30-2.20 (m, 2H), 1.83 (quintet, *J* = 5.5 Hz, 2H) 1.74 (dt, *J* = 2.0, 2.0 Hz, 3H), 0.21 (s, 6H); <sup>13</sup>C NMR (CDCl<sub>3</sub>, 125 MHz): δ = 141.7, 137.2, 64.3, 30.7, 28.5, 22.4, -1.3; HRMS (CI, NH<sub>3</sub>): calcd for C<sub>8</sub>H<sub>20</sub>NOSi (M+NH<sub>4</sub>): 174.1314; found: 174.1307.

**2,2,3,7,7-Pentamethyl-2,5,6,7-tetrahydro-1,2-oxasilepine (8c).** The procedure for the preparation of **8a** was followed using 2-methyl-5-heptyn-2-ol (**7**) (1.88 g, 15.0 mmol), 1,1,3,3-tetramethyldisilazane (8.00 mL, 6.02 g, 45.0 mmol), and [Cp\*Ru(NCCH<sub>3</sub>)<sub>3</sub>]PF<sub>6</sub> (0.151 g, 0.299 mmol, 2.0 mol %) gave **8c** (2.66 g, 14.4 mmol, 88%) as a slightly green oil after distillation (bp = 100-110 °C at 30 mmHg). IR (neat, diamond ATR): 2973, 2917, 1623, 1252, 1166, 1045, 907, 856, 827, 778, 678, 648 cm<sup>-1</sup>; <sup>1</sup>H NMR (CDCl<sub>3</sub>, 300 MHz): δ = 6.24 (tq, *J* = 4.0, 1.8 Hz, 1H), 2.30-2.20 (m, 2H), 1.80-1.70 (m, 2H) 1.60-1.50 (m, 3H), 1.25 (s, 6H), 0.18 (s, 6H); <sup>13</sup>C NMR (CDCl<sub>3</sub>, 125 MHz): δ = 142.6, 135.9, 73.8, 42.4, 30.5, 26.7, 22.4, 0.8. *Anal.* Calcd for C<sub>10</sub>H<sub>20</sub>OSi: C, 65.15; H, 10.94. Found: C, 65.08; H, 11.15.

**(Z)-4-(2,5-Dimethoxy-4-methylphenyl)pent-3-en-1-ol (10).** The following were charged to a screw-cap culture tube: siloxane **8a** (0.101 g, 0.703 mmol, 1.0 equiv), THF (4 mL), 1-iodo-2,5-dimethoxy-4-methylbenzene (**9**) (0.293 g, 1.05 mmol, 1.5 equiv), and TBAF (1.40 mL 1 M in THF, 1.40 mmol) followed by Pd<sub>2</sub>(dba)<sub>3</sub> (0.064 g, 0.070 mmol, 10 mol %). The tube was capped and after stirring 5 min, the tube was placed in a 50 °C oil bath for 18 h. The cooled mixture was filtered through a plug of silica gel, rinsing the plug with

---

<sup>3</sup> Arnold, H.; Overman, L. E.; Sharp, M. J.; Witschel, M. C. *Org. Synth. Coll. Vol. IX*, J. P. Freeman, Ed.; Wiley, 1998, 46.

Et<sub>2</sub>O. The filtrate was concentrated by rotary evaporation and purified by flash chromatography (2:1 hexanes:EtOAc) to provide **10** as a pale yellow oil (0.152 g, 0.643 mmol, 92%). *R<sub>f</sub>* = 0.30 (2:1 hexanes:EtOAc); IR (neat, diamond ATR): 3356 (br), 2934, 1502, 1465, 1208, 1041, 865 cm<sup>-1</sup>; <sup>1</sup>H NMR (CDCl<sub>3</sub>, 300 MHz): δ = 6.73 (s, 1H), 6.53 (s, 1H), 5.51 (t, *J* = 7.5 Hz, 1H), 3.78 (s, 3H), 3.77 (s, 3H), 3.56 (br t, *J* = 6.5 Hz, 2H), 2.23 (s, 3H), 2.10 (app q, *J* = 6.5 Hz, 2H), 2.00 (s, 3H); <sup>13</sup>C NMR (CDCl<sub>3</sub>, 75 MHz): δ = 151.8, 149.3, 137.6, 128.4, 125.9, 124.3, 114.4, 111.9, 62.0, 56.2, 56.0, 32.8, 25.2, 16.3; HRMS (ESI): calcd for C<sub>14</sub>H<sub>20</sub>NaO<sub>3</sub> (M+Na): 259.1310; found: 259.1311. *Anal.* Calcd for C<sub>14</sub>H<sub>20</sub>O<sub>3</sub>: C, 71.16; H, 8.53. Found: C, 71.44; H, 8.72.

**(Z)-5-(2,5-Dimethoxy-4-methylphenyl)hex-4-en-1-ol (11).** The procedure used for the preparation of **10** was followed. Siloxane **8b** (0.166 g, 1.00 mmol), THF (4 mL), iodide **9** (0.417 g, 1.50 mmol, 1.5 equiv), TBAF (2.0 mL, 1M in THF, 2.0 mmol) and Pd<sub>2</sub>(dba)<sub>3</sub> (0.0229 g, 0.0250 mmol, 2.5 mol %) gave **11** (0.129 g, 0.515 mmol, 52%) as a pale yellow oil after flash chromatography (3:1 hexanes:EtOAc). *R<sub>f</sub>* = 0.20 (3:1 hexanes:EtOAc); IR (neat, diamond ATR): 3363 (br), 2933, 1502, 1465, 1397, 1206, 1045, 863, 801 cm<sup>-1</sup>; <sup>1</sup>H NMR (CDCl<sub>3</sub>, 500 MHz): δ = 6.74 (s, 1H), 6.52 (s, 1H), 5.50 (tq, *J* = 7.3, 1.5 Hz, 1H), 3.78 (s, 3H), 3.77 (s, 3H), 3.57 (br t, *J* = 6.5 Hz, 2H), 2.23 (s, 3H), 1.98 (q, *J* = 1.5 Hz, 3H), 1.93 (app qq, *J* = 7.3, 1.5 Hz, 2H), 1.84 (br s, 1H, OH), 1.59 (quintet, *J* = 6.5 Hz, 2H); <sup>13</sup>C NMR (CDCl<sub>3</sub>, 125 MHz): δ = 151.7, 149.6, 134.6, 128.8, 127.7, 125.8, 114.6, 112.1, 62.4, 56.3, 56.0, 32.3, 25.8, 24.9, 16.3; HRMS (ESI): calcd for C<sub>15</sub>H<sub>22</sub>NaO<sub>3</sub> (M+Na): 273.1467; found: 273.1467. *Anal.* Calcd for C<sub>15</sub>H<sub>22</sub>O<sub>3</sub>: C, 71.97; H, 8.86. Found: C, 72.23; H, 8.64.

**(Z)-6-(2-Bromophenyl)-2-methylhept-5-en-2-ol (13).** The procedure used for the preparation of **10** was followed. Siloxane **8c** (0.563 g, 3.05 mmol), THF (8 mL), iodide **12** (0.58 mL, 1.28 g, 4.52 mmol, 1.5 equiv), TBAF (6.00 mL, 1 M in THF, 6.00 mmol) and Pd<sub>2</sub>(dba)<sub>3</sub> (0.077 g, 0.084 mmol, 2.8 mol %) gave **13** (0.750 g, 2.65 mmol, 87%) as a pale yellow oil after flash chromatography (4:1 hexanes:EtOAc). *R<sub>f</sub>* = 0.25 (4:1 hexanes:EtOAc); IR (neat, diamond ATR): 3368, 3052, 2968, 2930, 2850, 1590, 1560, 1469, 1429, 1373, 1144, 1022, 905, 754, 729, 654 cm<sup>-1</sup>; <sup>1</sup>H NMR (CDCl<sub>3</sub>, 300 MHz): δ = 7.57 (dd, *J* = 7.5, 1.0 Hz, 1H), 7.26 (td, *J* = 7.5, 1.0 Hz, 1H), 7.20-7.10 (m, 2H), 5.55 (tq, *J* = 7.5, 1.5 Hz, 1H), 1.97 (q, *J* = 1.5 Hz, 3H), 1.90-1.70 (m, 2H),

1.50-1.40 (m, 2H), 1.09 (s, 6H);  $^{13}\text{C}$  NMR ( $\text{CDCl}_3$ , 125 MHz):  $\delta$  = 143.0, 136.4, 132.7, 129.9, 128.6, 128.2, 127.4, 122.4, 70.9, 43.1, 29.7, 29.0, 24.4; *Anal.* Calcd for  $\text{C}_{14}\text{H}_{19}\text{BrO}$ : C, 59.37; H, 6.76. Found: C, 58.95; H, 6.73.

**(Z)-6-(2-Bromo-4-methylphenyl)-2-methylhept-5-en-2-ol (15).** The procedure used for the preparation of **10** was followed. Siloxane **8c** (1.05 g, 5.70 mmol), THF (12 mL), iodide **14** (2.53 g, 8.54 mmol, 1.5 equiv), TBAF (11.4 mL, 1 M in THF, 11.4 mmol) and  $\text{Pd}_2(\text{dba})_3$  (0.145 g, 0.158 mmol, 2.8 mol %) gave **15** (1.59 g, 5.35 mmol, 94%) as a pale yellow oil after flash chromatography (3:1 hexanes:EtOAc).  $R_f$  = 0.45 (3:1 hexanes:EtOAc); IR (neat, diamond ATR): 3379, 2969, 2925, 1604, 1489, 1375, 1208, 1149, 1035, 908, 853, 821, 734  $\text{cm}^{-1}$ ;  $^1\text{H}$  NMR ( $\text{CDCl}_3$ , 500 MHz):  $\delta$  = 7.40 (d,  $J$  = 1.0 Hz, 1H), 7.08 (dd,  $J$  = 7.8, 1.0 Hz, 1H), 6.97 (d,  $J$  = 7.8 Hz, 1H), 5.51 (tq,  $J$  = 7.3, 1.5 Hz, 1H), 2.32 (s, 3H), 1.95 (q,  $J$  = 1.5 Hz, 3H), 1.80-1.70 (m, 2H), 1.50-1.40 (m, 2H), 1.10 (s, 6H);  $^{13}\text{C}$  NMR ( $\text{CDCl}_3$ , 125 MHz):  $\delta$  = 139.9, 138.2, 136.3, 133.1, 129.6, 128.7, 128.2, 122.1, 70.9, 43.2, 29.0, 24.5, 24.3, 20.7. *Anal.* Calcd for  $\text{C}_{15}\text{H}_{21}\text{BrO}$ : C, 60.61; H, 7.12. Found: C, 60.25; H, 7.01.

**1-Bromo-4-chloro-2-iodo-5-methylbenzene (16).** A solution of 2-bromo-5-chloro-4-methylaniline<sup>4</sup> (7.70 g, 35.0 mmol) in water (145 mL) and conc. HCl (143 mL) was cooled in an ice bath.  $\text{NaNO}_2$  (2.67 g, 38.7 mmol) dissolved in water (5 mL) was added to the solution keeping the internal temperature below 10 °C. The mixture was stirred for 30 min at ice bath temperature. KI (6.41 g, 38.7 mmol) was dissolved in water (5 mL) and added to the mixture. The resulting dark brown solution was stirred overnight as it slowly warmed to room temperature. The suspension was extracted with  $\text{CH}_2\text{Cl}_2$  (150 mL) and the organic layer was washed successively with 10% NaOH (150 mL), 1 M  $\text{Na}_2\text{S}_2\text{O}_3$  (150 mL), 10% HCl (150 mL), sat  $\text{NaHCO}_3$  (150 mL) and brine (150 mL). The organic layer was dried over  $\text{MgSO}_4$ , filtered and concentrated via rotary evaporation. Recrystallization of the resulting material from EtOH gave **16** as a white solid (5.98 g, 18.1 mmol, 51%). Mp = 80.0 – 80.5 °C; IR (neat, diamond ATR): 3073, 2919, 1571, 874, 860, 759, 703  $\text{cm}^{-1}$ ;  $^1\text{H}$  NMR ( $\text{CDCl}_3$ , 500

<sup>4</sup> Bavetsias, V.; Skelton, L. A.; Yafai, F.; Mitchell, F.; Wilson, S. C.; Allan, B.; Jackman, A. L. *J. Med. Chem.*, **2002**, 45, 3692-3702.

MHz):  $\delta$  = 7.79 (s, 1H), 7.48 (s, 1H), 2.30 (s, 3H);  $^{13}\text{C}$  NMR ( $\text{CDCl}_3$ , 75 MHz):  $\delta$  = 139.4, 137.9, 134.0, 133.8, 127.5, 97.4, 19.6; *Anal.* Calcd for  $\text{C}_7\text{H}_7\text{ClBrI}$ : C, 25.37; H, 1.52. Found: C, 25.12; H, 1.33.

**(Z)-6-(2-Bromo-5-chloro-4-methylphenyl)-2-methylhept-5-en-2-ol (17).** The procedure used for the preparation of **10** was followed. Siloxane **8c** (0.336 g, 2.00 mmol), THF (4 mL), iodide **16** (0.994 g, 3.00 mmol, 1.5 equiv), TBAF (4.00 mL, 1 M in THF, 4.00 mmol) and  $\text{Pd}_2(\text{dba})_3$  (0.046 g, 0.050 mmol, 2.5 mol %) gave **17** (0.532 g, 1.60 mmol, 80%) as a pale yellow oil after flash chromatography (6:1 hexanes:EtOAc).  $R_f$  = 0.35 (6:1 hexanes:EtOAc); IR (neat, diamond ATR): 3377, 2968, 2926, 1475, 1443, 1146, 1062, 885  $\text{cm}^{-1}$ ;  $^1\text{H}$  NMR ( $\text{CDCl}_3$ , 500 MHz):  $\delta$  = 7.44 (s, 1H), 7.07 (s, 1H), 5.52 (tq,  $J$  = 7.2, 2.5 Hz, 1H), 2.37 (s, 3H), 1.93 (d,  $J$  = 2.5 Hz, 3H), 1.80-1.70 (m, 2H), 1.26 (t,  $J$  = 7.3 Hz, 2H), 1.12 (s, 6H);  $^{13}\text{C}$  NMR ( $\text{CDCl}_3$ , 75 MHz):  $\delta$  = 141.8, 136.1, 135.0, 134.5, 133.3, 129.8, 129.3, 120.0, 70.9, 43.0, 29.0, 24.4, 24.2, 19.5.

**1-(4-Bromo-5-iodo-2-methylphenyl)ethan-1-one (18).** A solution of  $\text{CaCO}_3$  (4.688 g, 4.700 mmol) in water (12 mL) was added to a solution of 4-amino-2-methylacetophenone<sup>5</sup> (4.044 g, 30.00 mmol) in MeOH (20 mL). This was followed by dropwise addition of a solution of ICl (5.02 g, 31.8 mmol) in MeOH (20 mL). The mixture was stirred at room temperature of 18 h, then diluted with  $\text{Et}_2\text{O}$  (100 mL) and quenched with water (50 mL). The aqueous layer was extracted with ether (100 mL) and the combined organic layers were dried over  $\text{Na}_2\text{SO}_4$ . Filtration and concentration by rotary evaporation gave a crude product that was recrystallized from EtOH to give 4-amino-5-iodo-2-methylacetophenone (4.917 g, 17.10 mmol, 57%) as a yellow solid that was used in the next reaction. Mp = 118-120  $^\circ\text{C}$ ; IR (neat, diamond ATR): 3196, 2966, 1650, 1625, 1588, 1445, 1253  $\text{cm}^{-1}$ ;  $^1\text{H}$  NMR ( $\text{CDCl}_3$ , 500 MHz):  $\delta$  = 8.07 (s, 1H), 6.54 (s, 1H), 4.46 (s, 2H,  $\text{NH}_2$ ), 2.50 (s, 3H), 2.47 (s, 3H);  $^{13}\text{C}$  NMR ( $\text{CDCl}_3$ , 75 MHz):  $\delta$  = 197.5, 149.8, 142.3, 138.7, 129.0, 116.9, 78.2, 28.7, 22.4.

A solution of  $\text{NaNO}_2$  (1.239 g, 18.00 mmol) in water (16 mL) was added dropwise over 15 min to a mixture of 4-amino-5-iodo-2-methylacetophenone (4.133 g, 15.00 mmol) and HBr (47% w/w, 36 mL) that had been cooled to -10  $^\circ\text{C}$ . The mixture was stirred for 10 min before warming to 0  $^\circ\text{C}$  and stirring 2 h. This solution was then

<sup>5</sup> Royer, R.; Eckert, B. *J. Org. Chem.*, **1952**, 17, 1463-1465.

added dropwise over 30 min to a vigorously stirred mixture of CuBr (2.601 g, 18.00 mmol) and HBr (47%, 20 mL) that was heated to 60 °C. The mixture was stirred an additional 30 min at 80 °C before cooling to room temperature. The mixture was diluted with water (200 mL) and extracted with EtOAc (200 mL). The organic layer was washed with 1 M HCl (150 mL), sat NaHCO<sub>3</sub>, and brine (125 mL). The organic layer was dried over MgSO<sub>4</sub>, filtered and concentrated by rotary evaporation. The crude product was purified by flash chromatography (3:1 hexanes:EtOAc) to give iodide **18** (1.443 g, 4.230 mmol, 28%) as an oil.  $R_f$  = 0.50 (3:1 hexanes:EtOAc); IR (neat, diamond ATR): 2974, 2923, 1674, 1570, 1526, 1235, 1125, 955, 884, 863 cm<sup>-1</sup>; <sup>1</sup>H NMR (CDCl<sub>3</sub>, 500 MHz):  $\delta$  = 8.09 (s, 1H), 7.53 (s, 1H), 2.55 (s, 3H), 2.44 (s, 3H); <sup>13</sup>C NMR (CDCl<sub>3</sub>, 75 MHz):  $\delta$  = 199.0, 140.5, 140.0, 137.6, 135.8, 133.3, 96.9, 29.3, 21.0.

**(Z)-1-(4-Bromo-5-(6-hydroxy-6-methylhept-2-en-2-yl)-2-methylphenyl)ethan-1-one (19).** The procedure used for the preparation of **10** was followed. Siloxane **8c** (0.226 g, 1.33 mmol), THF (4 mL), iodide **18** (0.646 g, 2.00 mmol, 1.5 equiv), TBAF (2.60 mL, 1 M in THF, 2.60 mmol) and Pd<sub>2</sub>(dba)<sub>3</sub> (0.033 g, 0.036 mmol, 2.7 mol %) gave **19** (0.260 g, 0.798 mmol, 60%) as a pale yellow oil after flash chromatography (3:1 hexanes:EtOAc).  $R_f$  = 0.20 (3:1 hexanes:EtOAc); IR (neat, diamond ATR): 3331, 2964, 2927, 2874, 1684, 1594, 1533, 1435, 1377, 1356, 1272, 1245, 1152, 1067, 958, 887 cm<sup>-1</sup>; <sup>1</sup>H NMR (CDCl<sub>3</sub>, 300 MHz):  $\delta$  = 7.48 (s, 1H), 7.40 (s, 1H), 5.52 (br t,  $J$  = 6.5 Hz, 1H), 2.56 (s, 3H), 2.47 (s, 3H), 1.93 (br s, 3H), 1.80-1.70 (m, 2H), 1.26 (t,  $J$  = 6.5 Hz, 2H), 1.12 (s, 6H); <sup>13</sup>C NMR (CDCl<sub>3</sub>, MHz):  $\delta$  = 200.6, 140.6, 138.6, 136.7, 136.0, 135.3, 130.6, 129.6, 126.1, 70.8, 43.1, 29.5, 24.2, 21.1, 19.8, 13.7.

**(Z)-6-(2-Methoxyphenyl)-2-methylhept-5-en-2-ol (21).** The procedure used for the preparation of **10** was followed. Siloxane **8c** (1.127 g, 6.110 mmol), THF (12 mL), iodide **20** (2.15 g, 9.10 mmol, 1.5 equiv), TBAF (12.2 mL, 1 M in THF, 12.2 mmol) and Pd<sub>2</sub>(dba)<sub>3</sub> (0.139 g, 0.152 mmol, 2.5 mol %) gave **21** (0.685 g, 2.92 mmol, 48%) as a pale yellow oil after flash chromatography (3:1 hexanes:EtOAc).  $R_f$  = 0.35 (3:1 hexanes:EtOAc); IR (neat, diamond ATR): 3381, 2967, 1598, 1491, 1465, 1433, 1375, 1245, 1150, 1046, 905, 801, 753 cm<sup>-1</sup>; <sup>1</sup>H NMR (CDCl<sub>3</sub>, 500 MHz):  $\delta$  = 7.24 (td,  $J$  = 7.5, 2.0 Hz, 1H), 7.02 (dd,  $J$  = 7.5, 2.0 Hz, 1H),



6.94 (td,  $J = 7.5, 1.0$  Hz, 1H), 6.90 (br d,  $J = 7.5$  Hz, 1H), 5.53 (br t,  $J = 6.5$  Hz, 1H), 3.80 (s, 3H), 1.97 (br s, 3H), 1.90 (app q,  $J = 6.5$  Hz, 2H), 1.50-1.40, m, 2H), 1.08 (s, 6H);  $^{13}\text{C}$  NMR ( $\text{CDCl}_3$ , 125 MHz):  $\delta = 155.6, 142.4, 133.6, 129.2, 127.8, 127.4, 120.0, 110.2, 70.5, 54.8, 44.4, 42.6, 29.0, 28.4, 24.1$ ; *Anal.* Calcd for  $\text{C}_{15}\text{H}_{22}\text{O}_2$ : C, 76.88; H, 9.46. Found: C, 76.52; H, 9.64.

**(Z)-6-(2,6-Dimethylpyridin-3-yl)-2-methylhept-5-en-2-ol (23).** The procedure used for the preparation of **10** was followed. Siloxane **8c** (0.0931 g, 0.504 mmol), THF (2 mL), iodide **22** (0.0950 g, 0.408 mmol), TBAF (0.92 mL, 1M in THF, 0.92 mmol) and  $\text{Pd}_2(\text{dba})_3$  (0.0102 g, 0.0111 mmol, 2.7 mol %) gave **23** (0.0544 g, 0.237 mmol, 58%) as a pale yellow oil after flash chromatography (EtOAc).  $R_f = 0.35$  (EtOAc); IR (neat, diamond ATR): 3350, 2967, 1926, 1591, 1564, 1466, 1432, 1148, 1026, 906, 828, 731  $\text{cm}^{-1}$ ;  $^1\text{H}$  NMR ( $\text{CDCl}_3$ , 300 MHz):  $\delta = 7.20$  (d,  $J = 7.9$  Hz, 1H), 6.96 (d,  $J = 7.9$  Hz, 1H), 5.52 (tq,  $J = 7.5, 1.3$  Hz, 1H), 2.51 (s, 3H), 2.41 (s, 3H), 1.91 (q,  $J = 1.3$  Hz), 1.80-1.70 (m, 2H), 1.50-1.40 (m, 2H), 1.09 (s, 6H);  $^{13}\text{C}$  NMR ( $\text{CDCl}_3$ , 75 MHz):  $\delta = 155.8, 154.4, 136.6, 134.4, 133.5, 128.8, 120.5, 70.7, 43.2, 29.0, 24.9, 24.1, 23.9, 21.8$ ; HRMS: calcd for  $\text{C}_{15}\text{H}_{23}\text{NONa}$  ( $\text{M}+\text{Na}$ ): 256.1677; found: 256.1685.

**(Z)-2,2,6,9-Tetramethyl-3,4-dihydro-2H-benzo[b]oxocine (24) and (Z)-2-methyl-6-(p-tolyl)hept-5-en-2-ol (25).** A small screw-cap vial was charged with bromide **15** (0.119 g, 0.400 mmol),  $\text{Pd}_2(\text{dba})_3$  (0.0366 g, 0.0399 mmol, 10 mol %), CTC Q-Phos (0.0285 g, 0.0401 mmol, 10 mol %), and  $\text{NaOt-Bu}$  (0.0460 g, 0.479 mmol). Toluene was added (2 mL), the vial was flushed with argon, capped, and heated in an 80 °C oil bath for 24 h. The mixture was filtered through a silica plug and concentrated. Flash chromatography (19:1 hexanes:EtOAc gradient to 3:1 hexanes:EtOAc) gave **24** (0.0082 g, 0.0379 mmol, 10%) and **25** (0.0108 g, 0.0495 mmol, 12%) as pale yellow oils.

**(Z)-2,2,6,9-tetramethyl-3,4-dihydro-2H-benzo[b]oxocine (24):**  $R_f = 0.40$  (19:1 hexanes:EtOAc); IR (neat, diamond ATR): 3024, 2972, 2923, 2856, 1610, 1560, 1500, 1382, 1365, 1283, 1237, 1217, 1170, 1139, 1126, 961, 822  $\text{cm}^{-1}$ ;  $^1\text{H}$  NMR ( $\text{CDCl}_3$ , 500 MHz):  $\delta = 7.13$  (d,  $J = 7.8$  Hz, 1H), 6.91 (dd,  $J = 7.8, 1.0$  Hz, 1H), 6.80 (d,  $J = 1.0$  Hz, 1H), 5.70 (br t,  $J = 6.5$  Hz, 1H), 2.31 (s, 3H), 2.20-2.10 (m, 2H), 1.98 (s, 3H), 1.50-1.40 (m,

2H), 1.34 (s, 6H);  $^{13}\text{C}$  NMR ( $\text{CDCl}_3$ , 125 MHz):  $\delta$  = 151.7, 136.7, 134.4, 130.4, 128.1, 126.64, 126.59, 124.5, 77.5, 35.4, 27.9, 26.2, 24.7, 21.1; MS (EI)  $m/z$  (rel int) = 216(100), 161(15), 159(46), 145(14); HRMS: calcd for  $\text{C}_{15}\text{H}_{20}\text{O}$ : 216.1514; found: 216.1509.

**(Z)-2-Methyl-6-(p-tolyl)hept-5-en-2-ol (25)**:  $R_f$  = 0.45 (3:1 hexanes:EtOAc);  $^1\text{H}$  NMR ( $\text{CDCl}_3$ , 500 MHz):  $\delta$  = 7.14 (d,  $J$  = 7.5 Hz, 2H), 7.07 (d,  $J$  = 7.5 Hz, 2H), 5.45 (tq,  $J$  = 7.5, 1.5 Hz, 1H), 2.35 (s, 3H), 2.15-2.00 (m, 2H), 2.00 (q,  $J$  = 1.5 Hz, 3H), 1.65-1.45 (m, 2H), 1.13 (s, 6H);  $^{13}\text{C}$  NMR ( $\text{CDCl}_3$ , 125 MHz):  $\delta$  = 138.9, 136.3, 136.1, 128.8, 127.7, 127.2, 71.0, 44.0, 29.1, 25.6, 24.3, 21.1; HRMS: calcd for  $\text{C}_{15}\text{H}_{20}$  (M- $\text{H}_2\text{O}$ ): 200.1566; found: 200.1547.

**2,2,6,9-Tetramethyl-3,4,5,6-tetrahydro-2H-benzo[b]oxocine (26)**. Ether **24** (0.0286 g, 0.132 mmol) was dissolved in EtOH (1.5 mL) and Pd on carbon (10%, 0.032 g, 0.030 mmol) was suspended in the solution. The mixture was flushed with argon before flushing the flask with hydrogen. A hydrogen balloon was affixed to the flask and the mixture was stirred overnight. The flask was flushed with argon, the mixture was filtered through a plug of silica gel, eluting with 19:1 hexanes:EtOAc. The filtrate was concentrated by rotary evaporation to give **26** (0.0128 g, 0.0587 mmol, 44%) as a pale yellow oil.  $^1\text{H}$  NMR ( $\text{CDCl}_3$ , 500 MHz): 7.10 (d,  $J$  = 7.8 Hz, 1H), 6.93 (d,  $J$  = 7.8 Hz, 1H), 6.75 (br s, 1H), 3.25-3.15 (br m, 1H), 2.29 (s, 3H), 1.80-1.70 (m, 1H), 1.70-1.45 (m, 3H), 1.45 (s, 3H), 1.45-1.30 (m, 2H), 1.35 (s, 3H), 1.25 (d,  $J$  = 7.0 Hz, 3H).

cea095-2b  
after distillation fraction #2

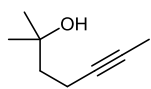

7

$^1\text{H}$  NMR  $\text{CDCl}_3$   
300 MHz

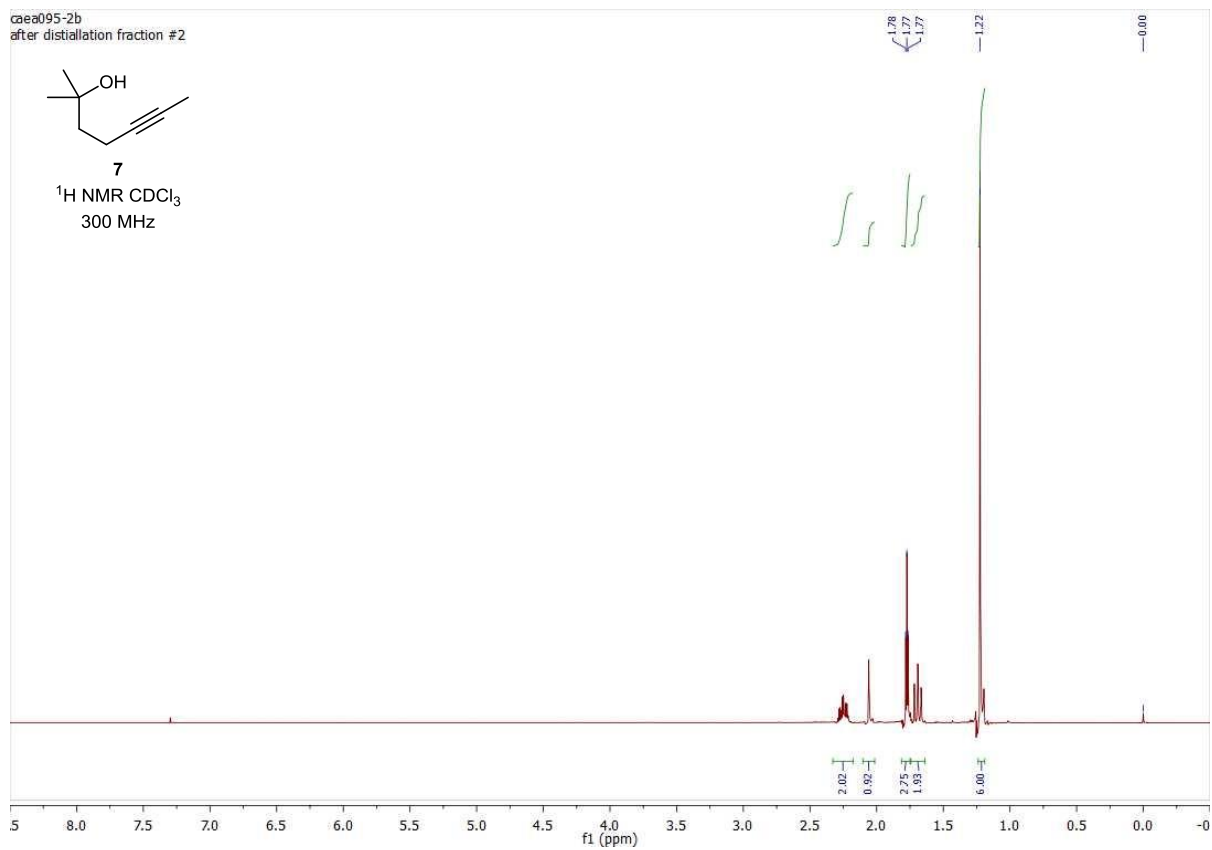

cea095-13C  
STANDARD PROTON PARAMETERS

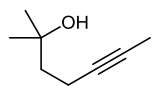

7

$^1\text{H}$  NMR  $\text{CDCl}_3$   
300 MHz

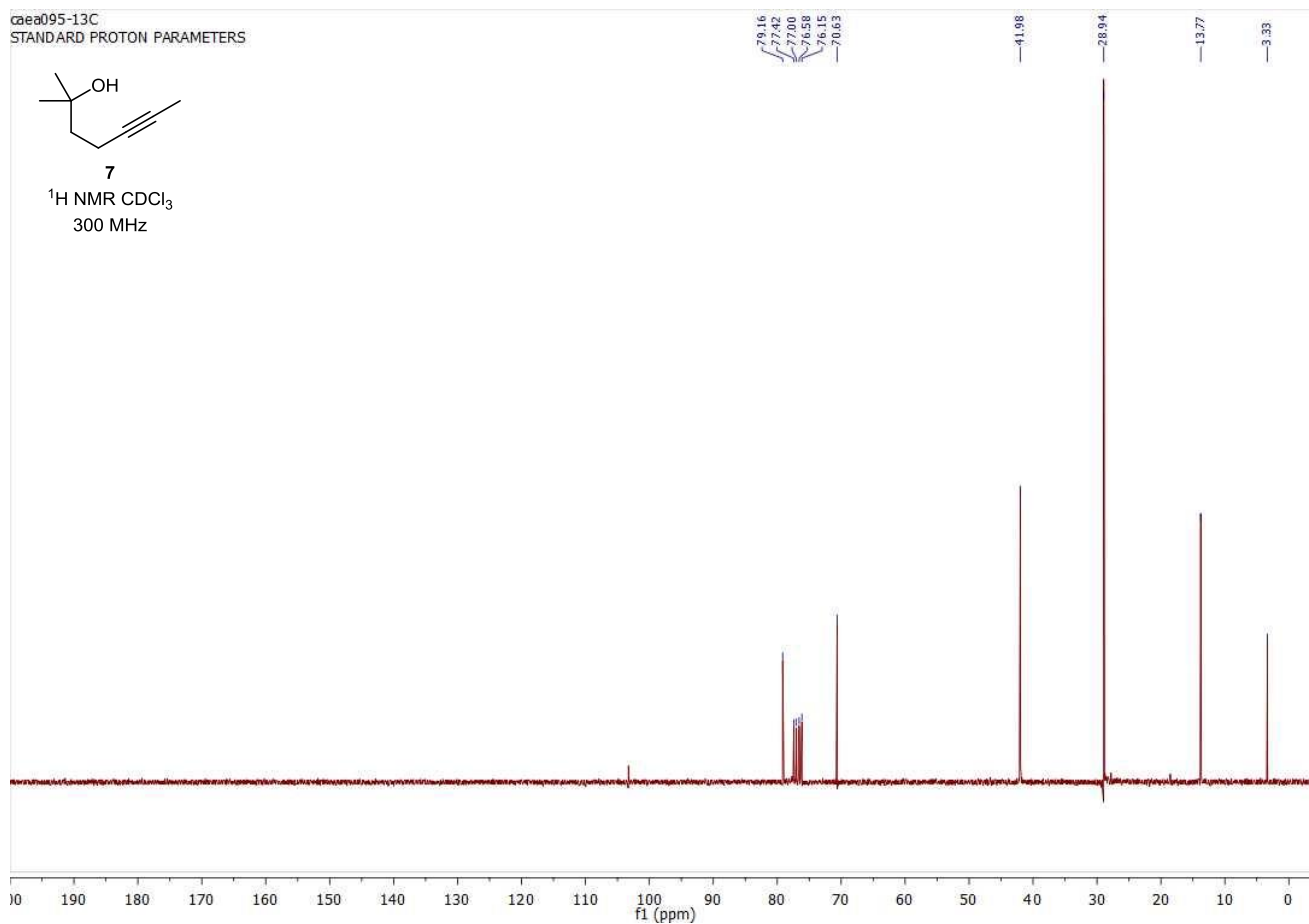

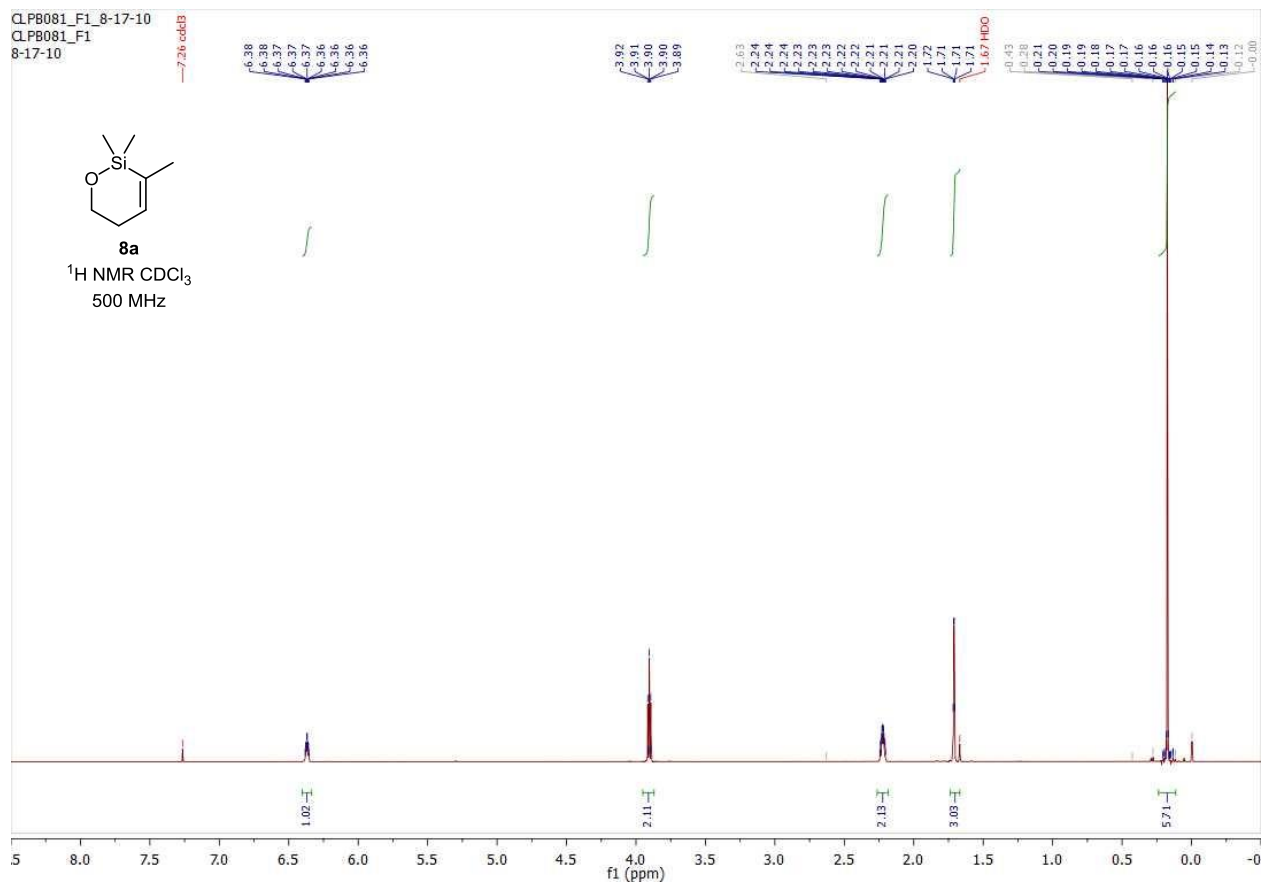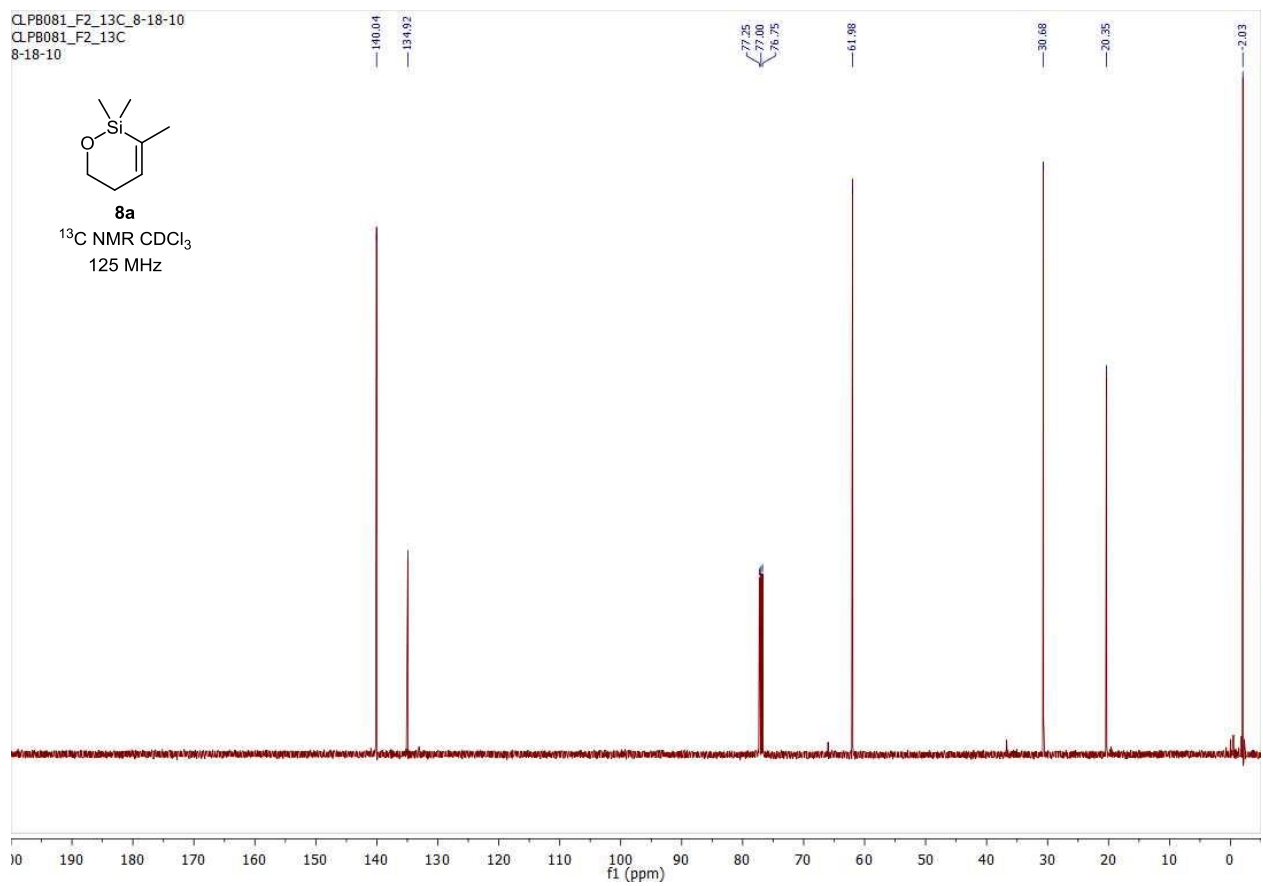

CLP8085 F2  
8-25-10

Sample Name:

Data Collected on:  
MercuryNMR-mercury300

Archive directory:  
Sample directory:

FidFile: CLP8085\_F2\_8-25-10  
Pulse Sequence: PROTON (zgpg30)  
Solvent: cdcl3  
Data collected on: Aug 25 2010

Operator: cport700

Relax. delay 1.000 sec  
Pulse 45.0 degrees  
Acq. time 1.703 sec  
Width 4810.9 Hz  
16 repetitions  
OBSERVE H1, 300.1461806 MHz  
DATA PROCESSING  
FT Size 16384  
Total time 0 min 44 sec

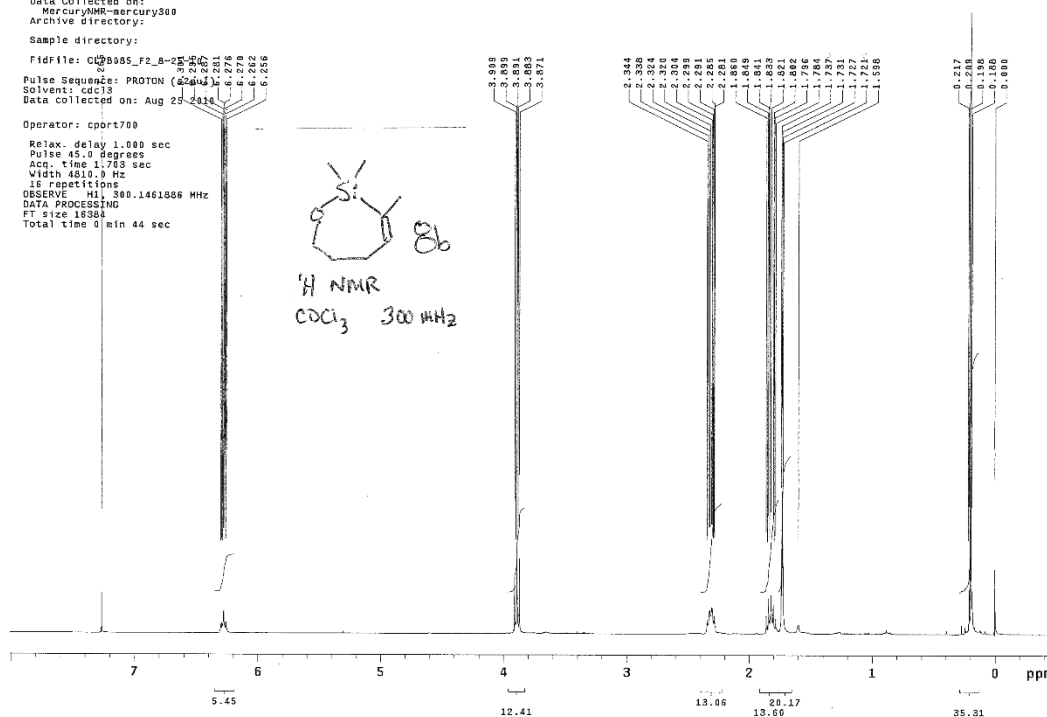

EDVA079 pure  
 Sample Name:  
 Data Collected on:  
 MercuryNMR-mercury300  
 Archive directory:  
 Sample directory:  
 FidFile: PROTON  
 Pulse Sequence: PROTON (s2pu1)  
 Solvent: CDCl3  
 Data collected on: Jun 26 2005  
 Operator: ewald700  
 Relax. delay 1.000 sec  
 Pulse 45.0 degrees  
 Acq. time 1.703 sec  
 Width 4010.0 Hz  
 8 repetitions  
 OBSERVE H1, 300.1451994 MHz  
 DATA PROCESSING  
 FT size 16384  
 Total time 0 min 23 sec

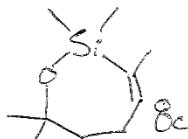

<sup>1</sup>H NMR  
 CDCl<sub>3</sub> 300 MHz

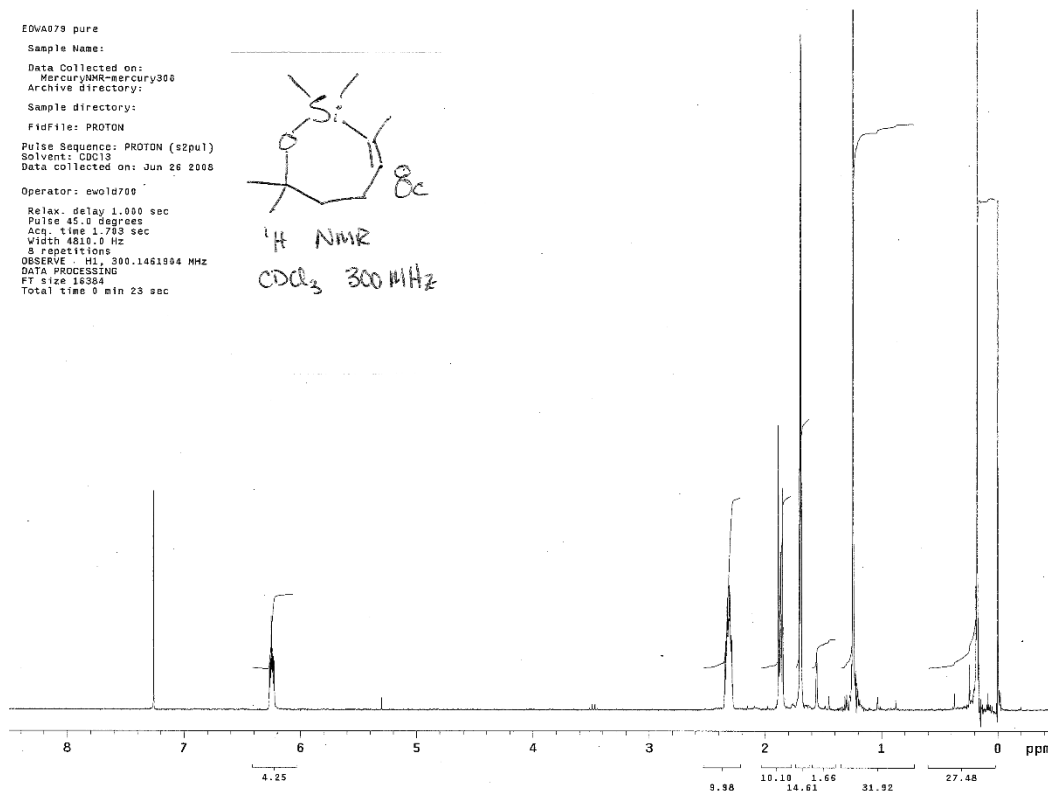

SLB0902ndfracc13  
 Carbon of purest sample  
 Sample Name:  
 SLB0902ndfracc13  
 Data Collected on:  
 MercuryNMR-mercury300  
 Archive directory:  
 Sample directory:  
 FidFile: CARBON  
 Pulse Sequence: CARBON (s2pu1)  
 Solvent: cdcl3  
 Data collected On: Mar 21 2005  
 Temp. 21.0 C / 294.1 K  
 Operator: sbay700  
 Relax. delay 1.000 sec  
 Pulse 45.0 degrees  
 Acq. time 0.868 sec  
 Width 18987.2 Hz  
 256 repetitions  
 OBSERVE C13, 75.4718194 MHz  
 DECOUPLE H1, 300.1476834 MHz  
 Power 36 dB  
 CONTINUOUSLY ON  
 WALTZ-16 modulated  
 DATA PROCESSING  
 Line broadening 0.5 Hz  
 FT size 32768  
 Total time 8 min 15 sec

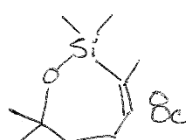

<sup>13</sup>C NMR  
 CDCl<sub>3</sub> 75 MHz

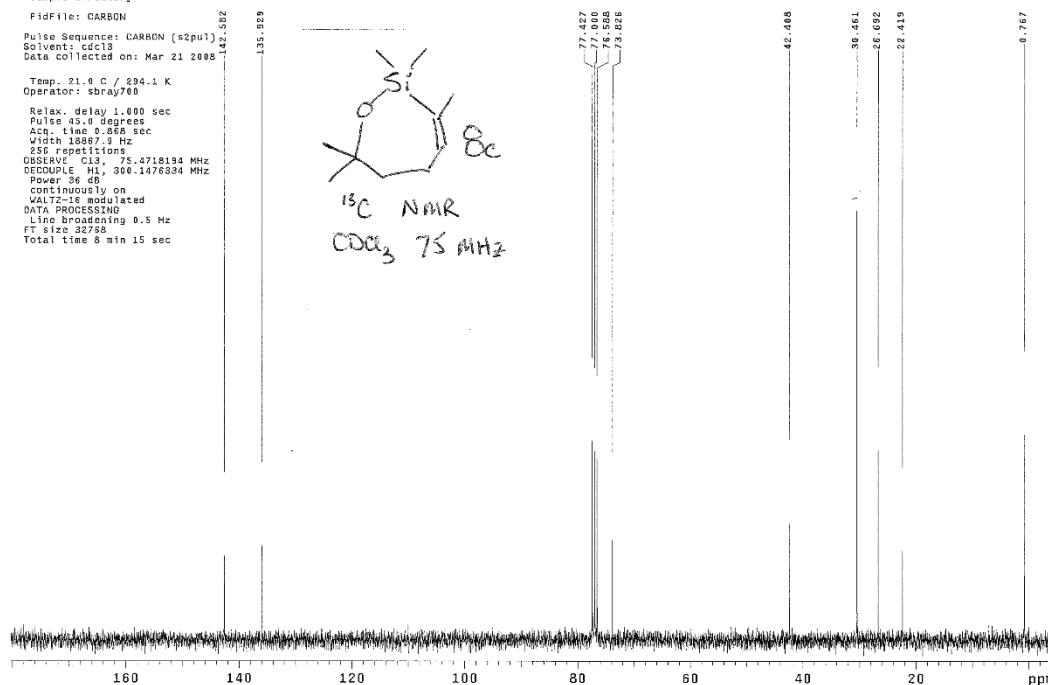

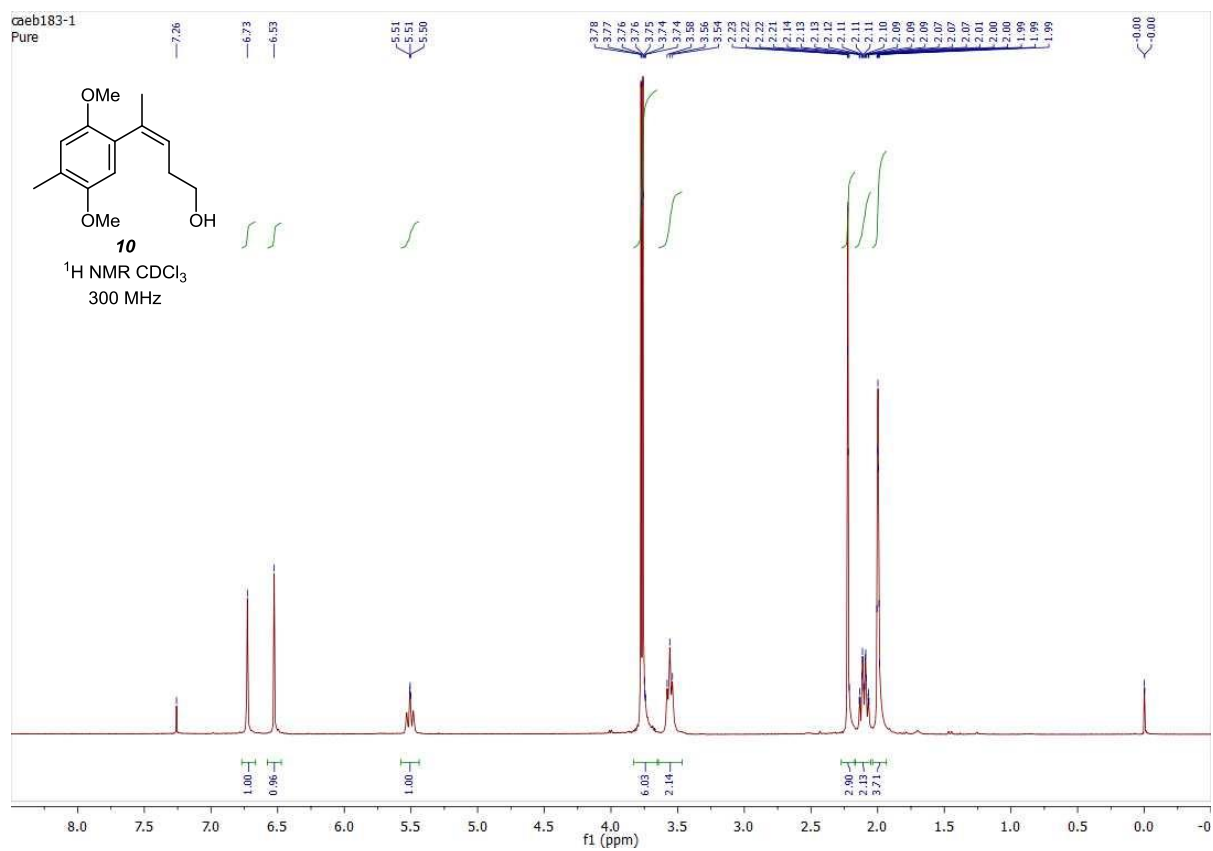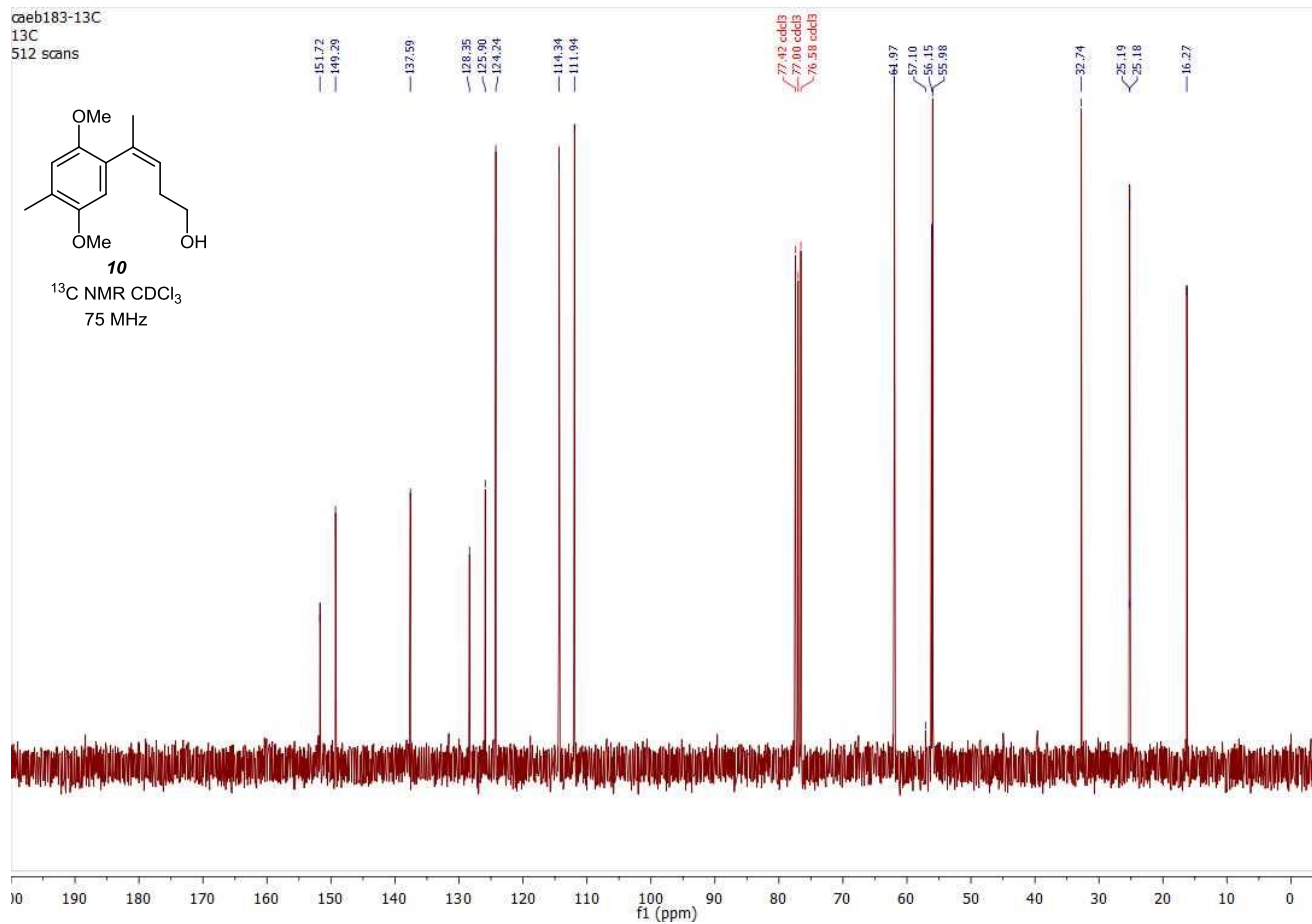

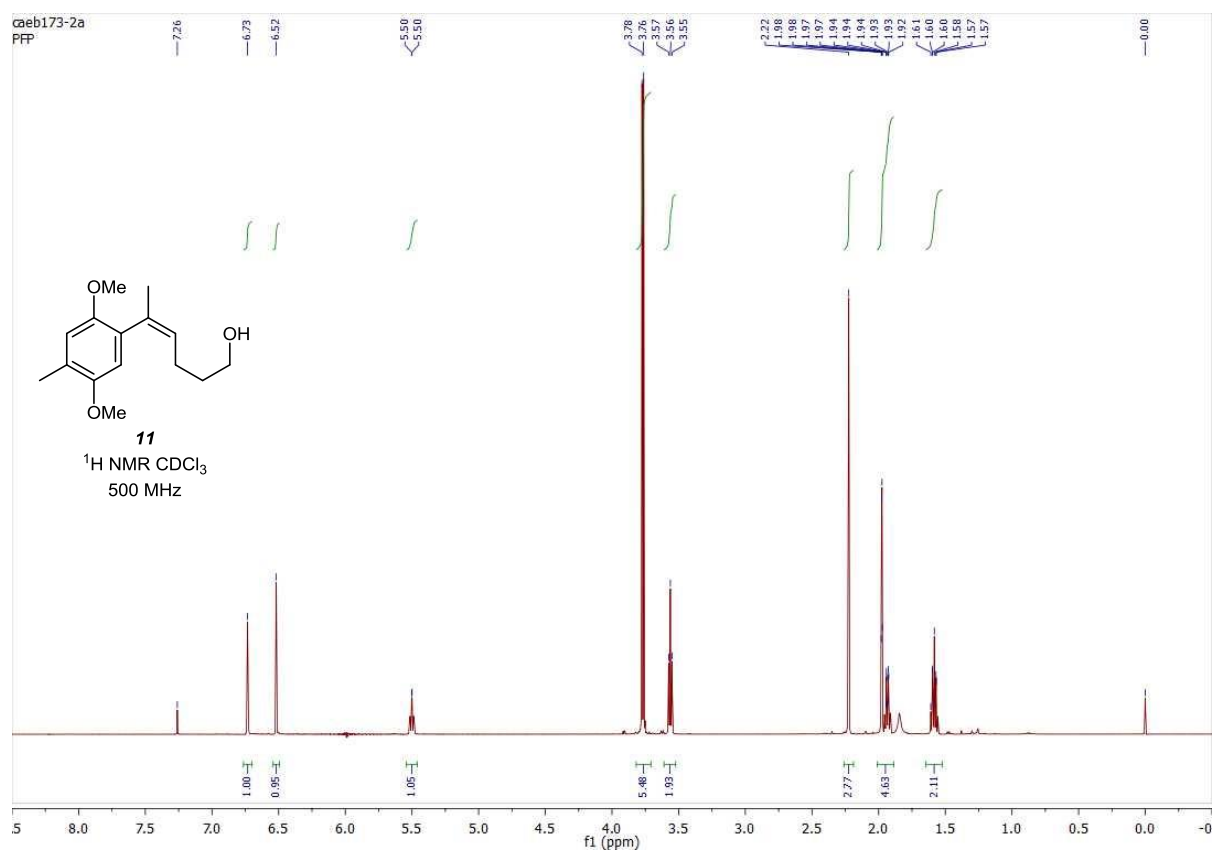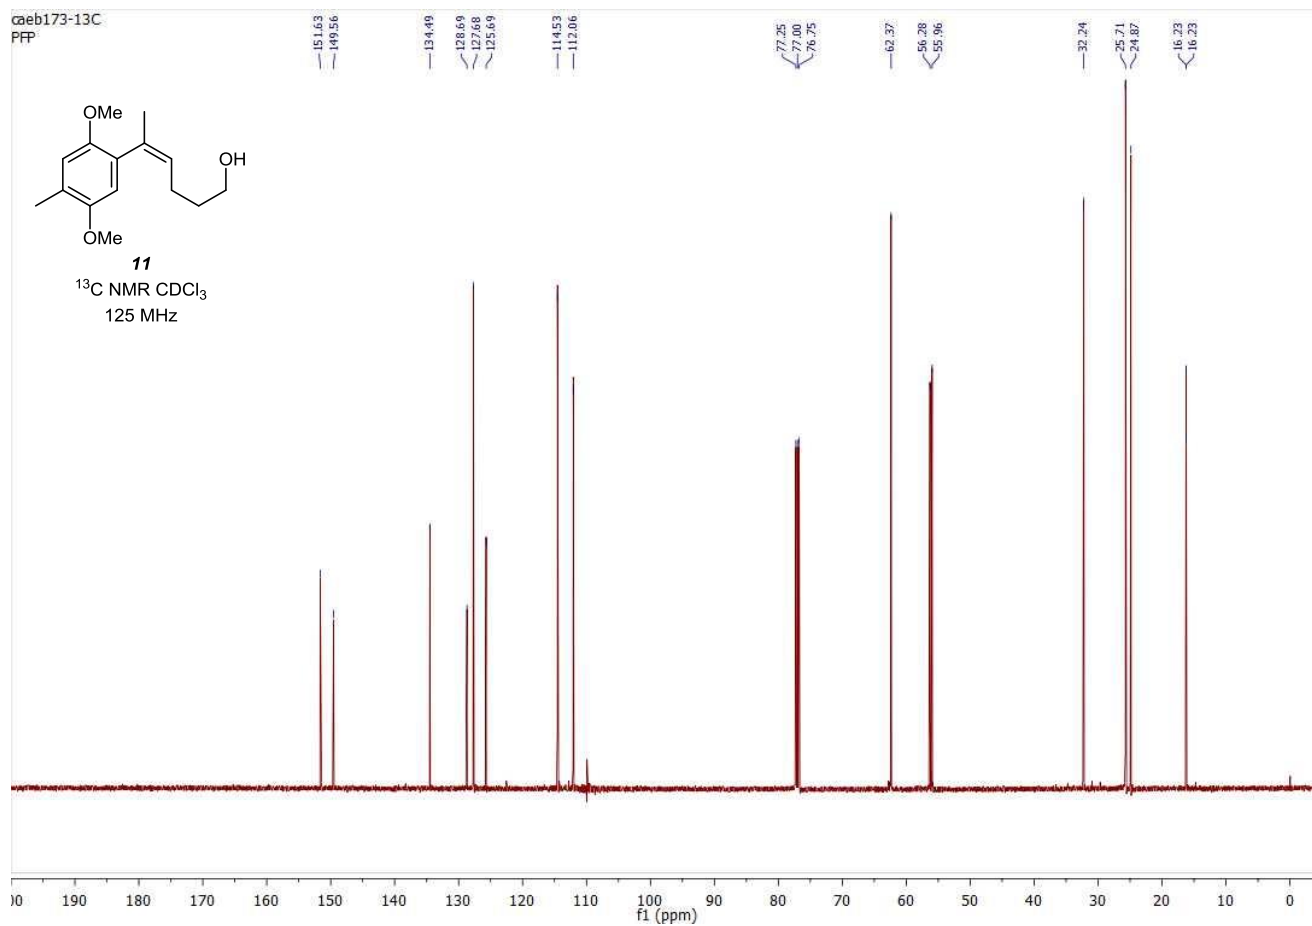



EDVA087 pure

Sample Name:

Data Collected on:  
InovaNMR-inova500

Archive directory:

Sample directory:

FidFile: PROTON

Pulse Sequence: PROTON (s2pu1)

Solvent: cdcl3

Data collected on: Sep 5 2008

Operator: ewold800

Relax. delay 1.000 sec

Pulse 45.0 degrees

Acq. time 2.048 sec

Width 8000.0 Hz

16 repetitions

OBSERVE N1, 499.7597864 MHz

DATA PROCESSING

FT size 32768

Total time 0 min 49 sec

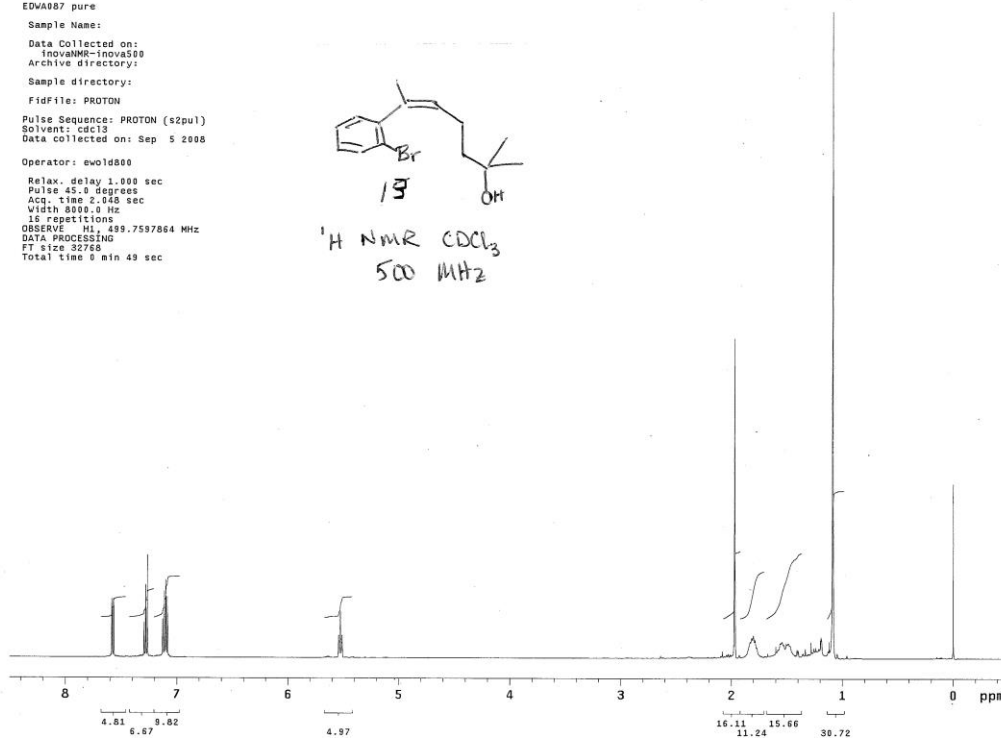

EDVA087 pure

Sample Name:

Data Collected on:  
InovaNMR-inova500

Archive directory:

Sample directory:

FidFile: CARBON

Pulse Sequence: CARBON (s2pu1)

Solvent: cdcl3

Data collected on: Sep 5 2008

Operator: ewold800

Relax. delay 1.000 sec

Pulse 45.0 degrees

Acq. time 1.042 sec

Width 31446.5 Hz

1950 repetitions

OBSERVE C13, 125.6646979 MHz

DECOUPLE N1, 499.7622897 MHz

Power 39 dB

continuously on

VALTZ-16 modulated

DATA PROCESSING

Line broadening 0.5 Hz

FT size 65536

Total time 34 min

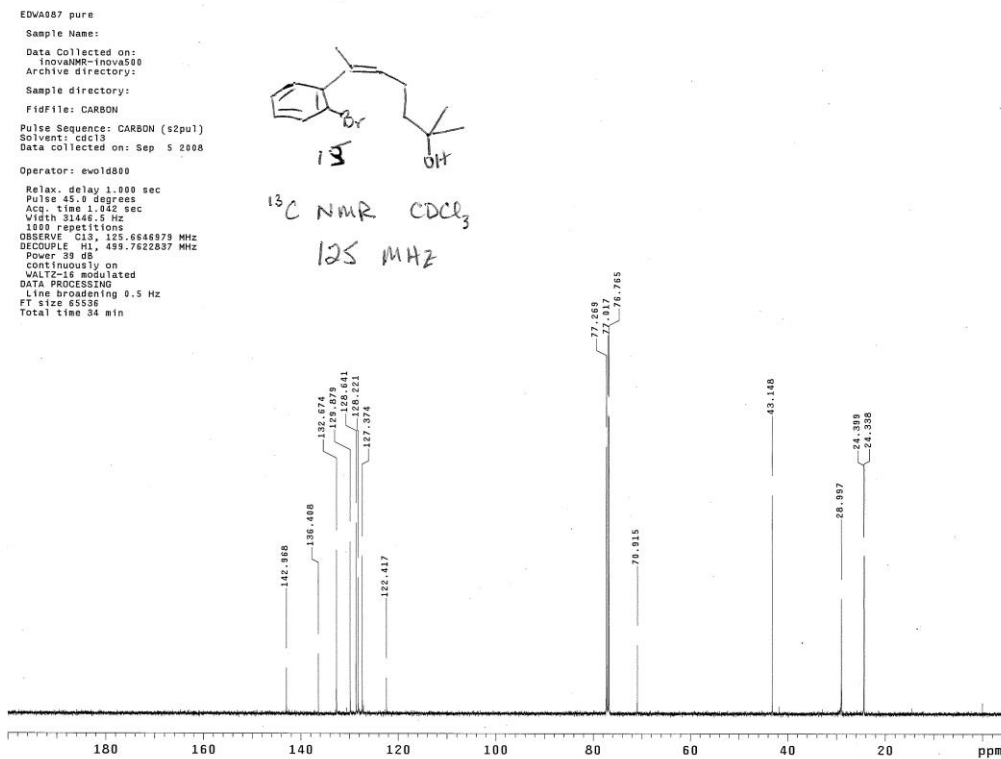

SL88040tube9-14 from F1/F2

Sample Name:  
SL88040tube9-14  
Data Collected on:  
inovaNMR-inova500  
Archive directory:  
Sample directory:  
FidFile: PROTON

Pulse Sequence: PROTON (s2pu1)  
Solvent: cdcl3  
Data collected on: Apr 14 2009

Temp. 20.0 C / 293.1 K  
Operator: sbray800  
Relax. delay 1.000 sec  
Pulse 45.0 degrees  
Acq. time 2.048 sec  
Width 8000.0 Hz  
16 repetitions  
OBSERVE H1, 499.7497390 MHz  
DATA PROCESSING  
FT size 32768  
Total time 0 min 48 sec

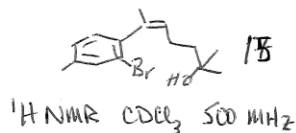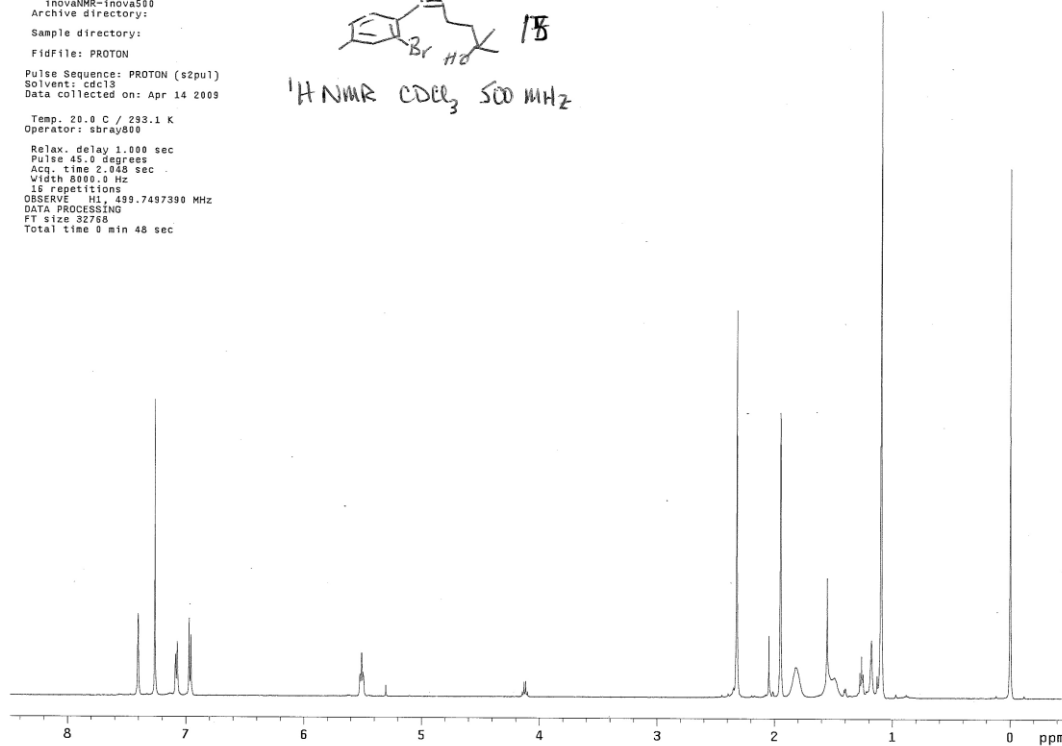

SL8092C13

Sample Name:  
SL8092C13  
Data Collected on:  
inovaNMR-inova500  
Archive directory:  
Sample directory:

FidFile: CARBON  
Pulse Sequence: CARBON  
Solvent: cdcl3  
Data collected on: 09/28/09  
Operator: sbray800  
Relax. delay 1.000 sec  
Pulse 45.0 degrees  
Acq. time 1.042 sec  
Width 31446.5 Hz  
436 repetitions  
OBSERVE C13, 125.1044969 MHz  
DECOUPLE H1, 499.7022037 MHz  
Power 39 dB  
continuously on  
WALTZ-16 modulated  
Line broadening 0.5 Hz  
DATA PROCESSING  
FT size 65536  
Total time 14 min

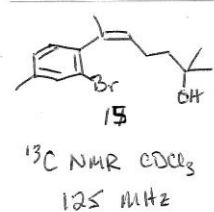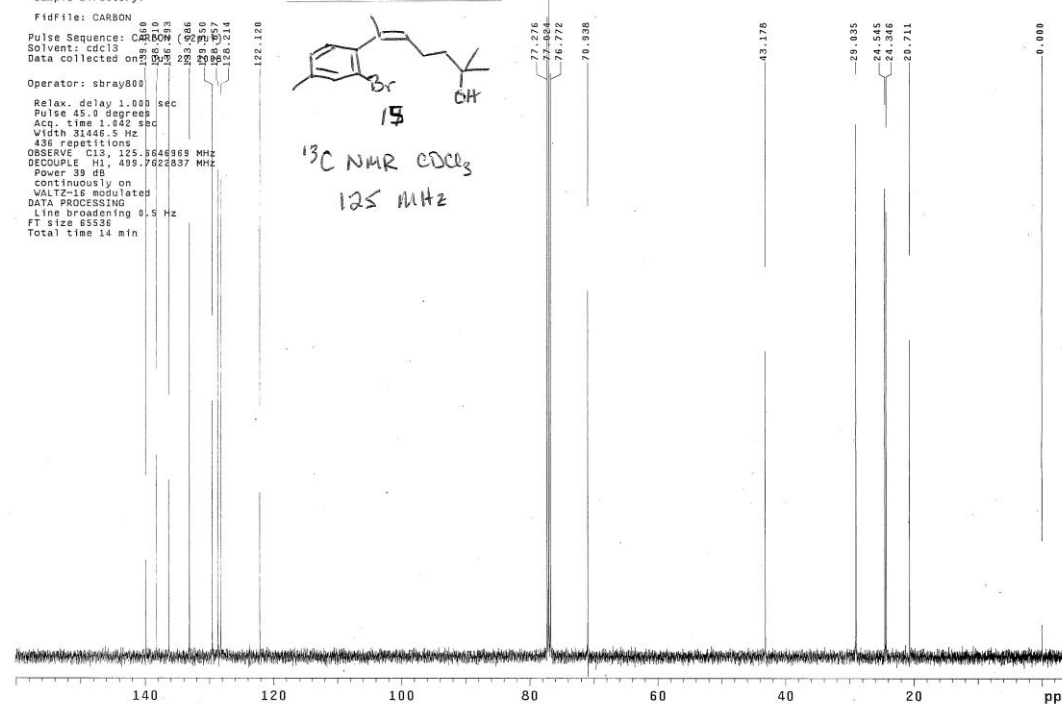

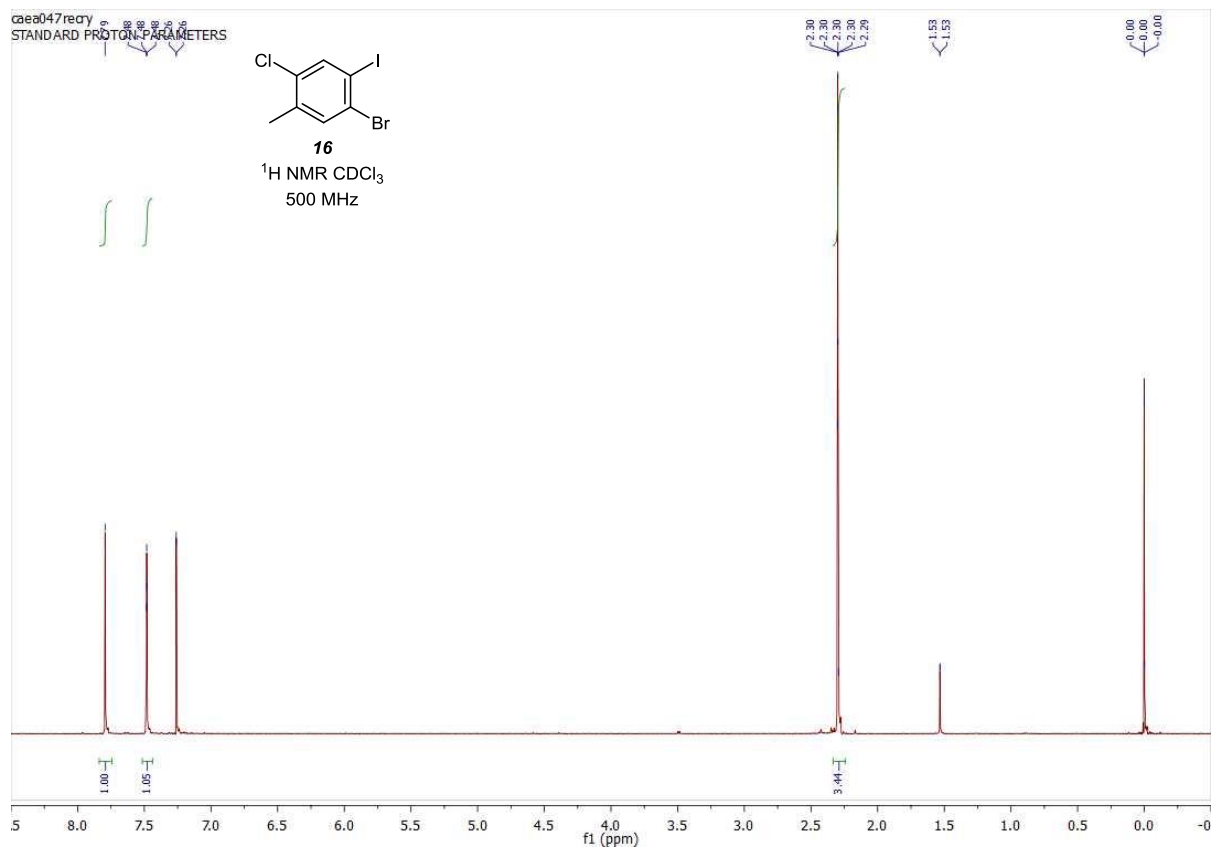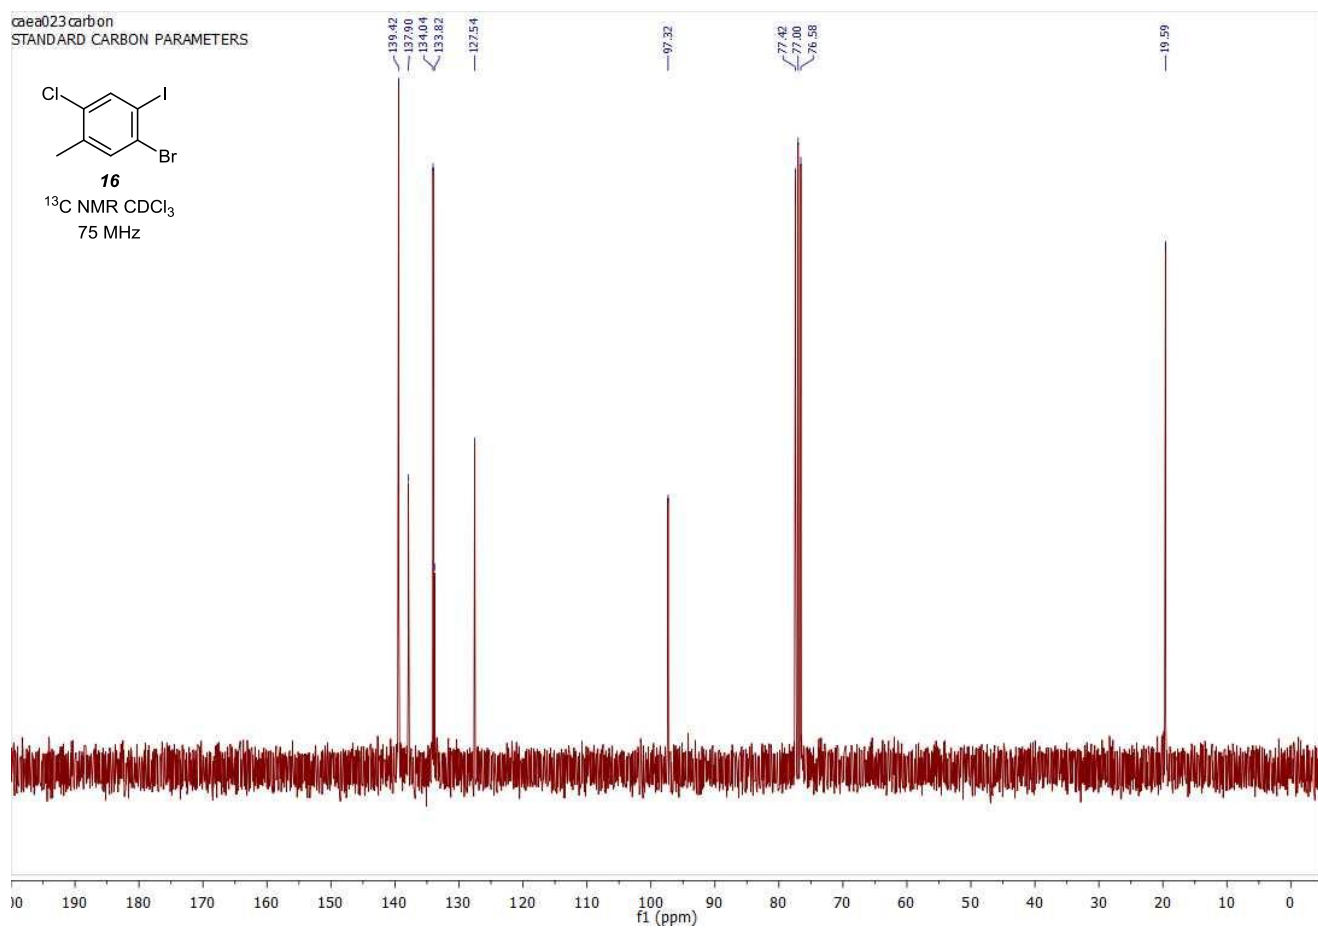

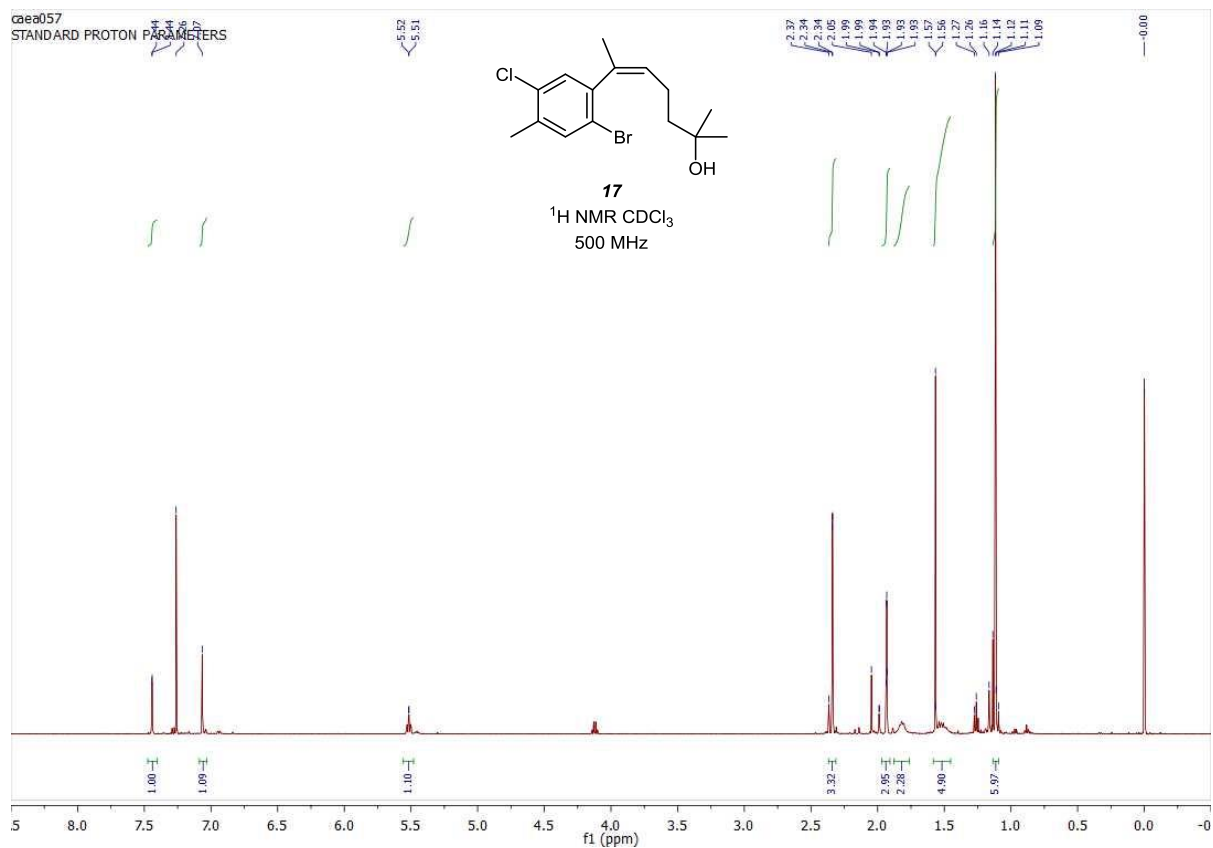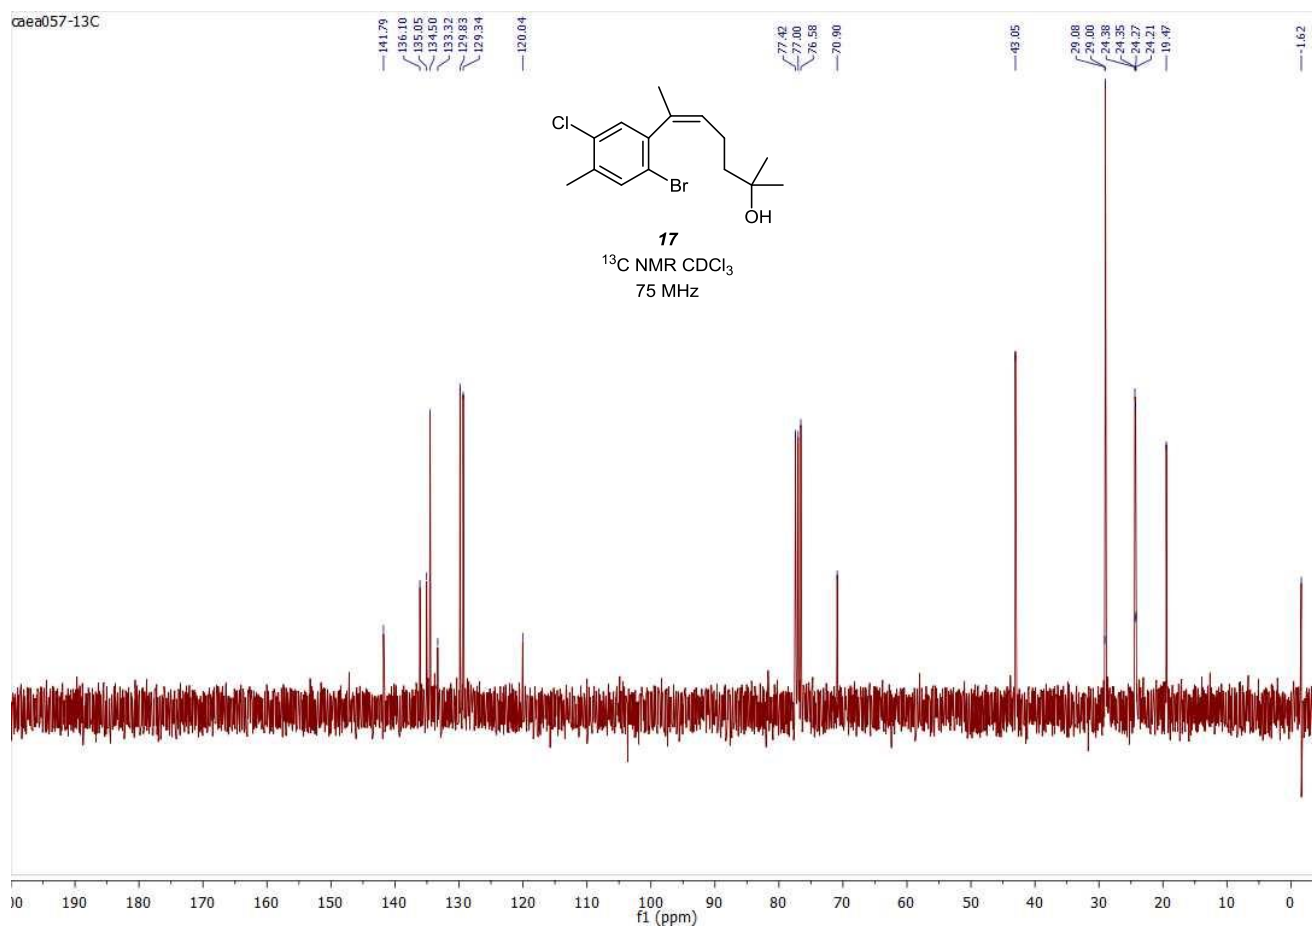

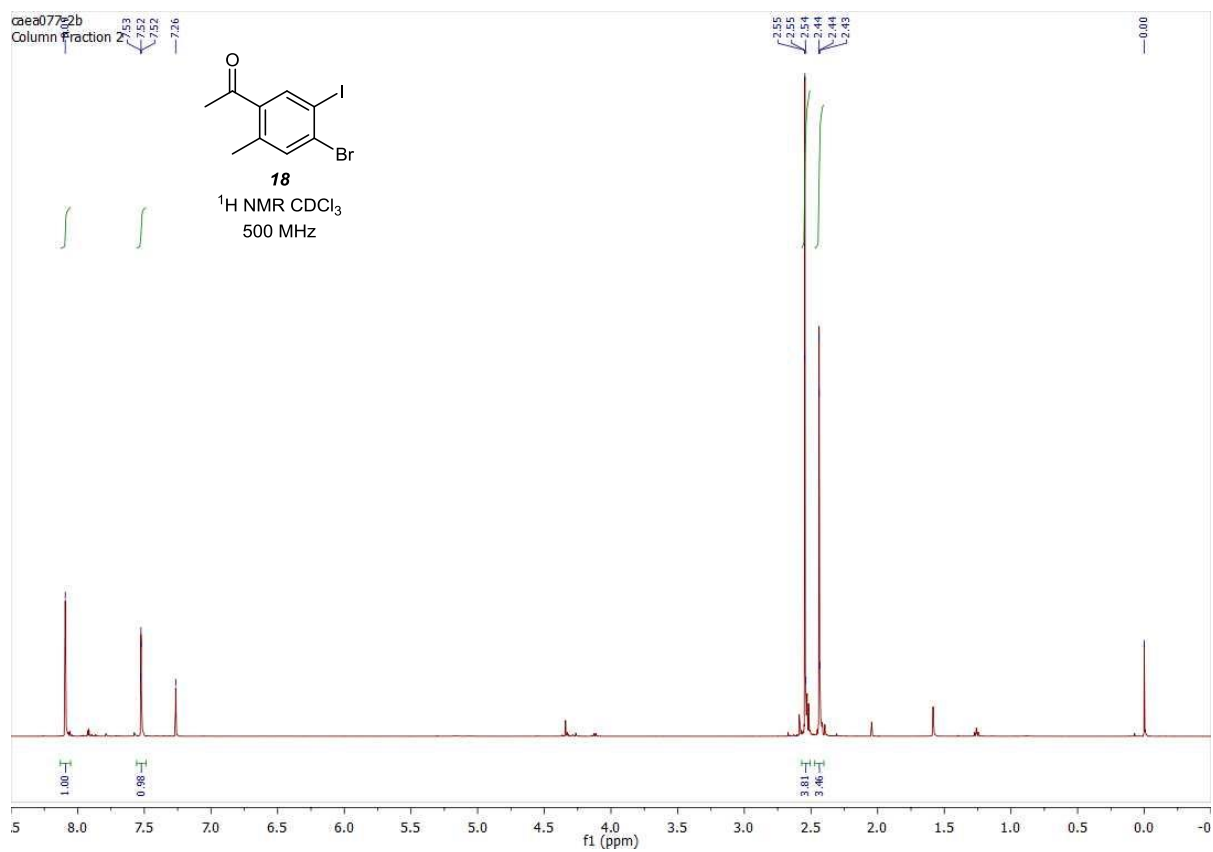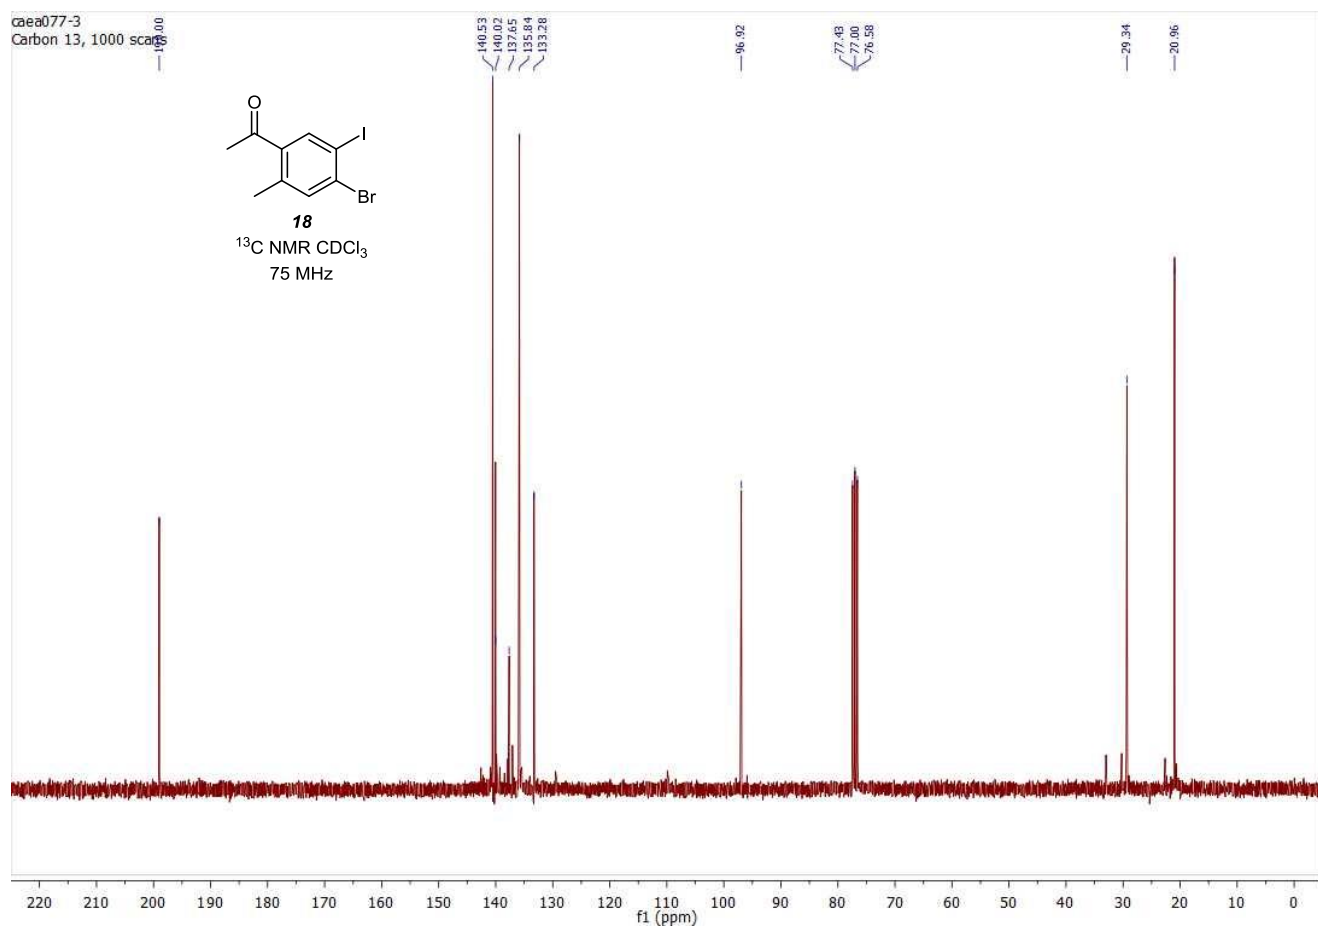

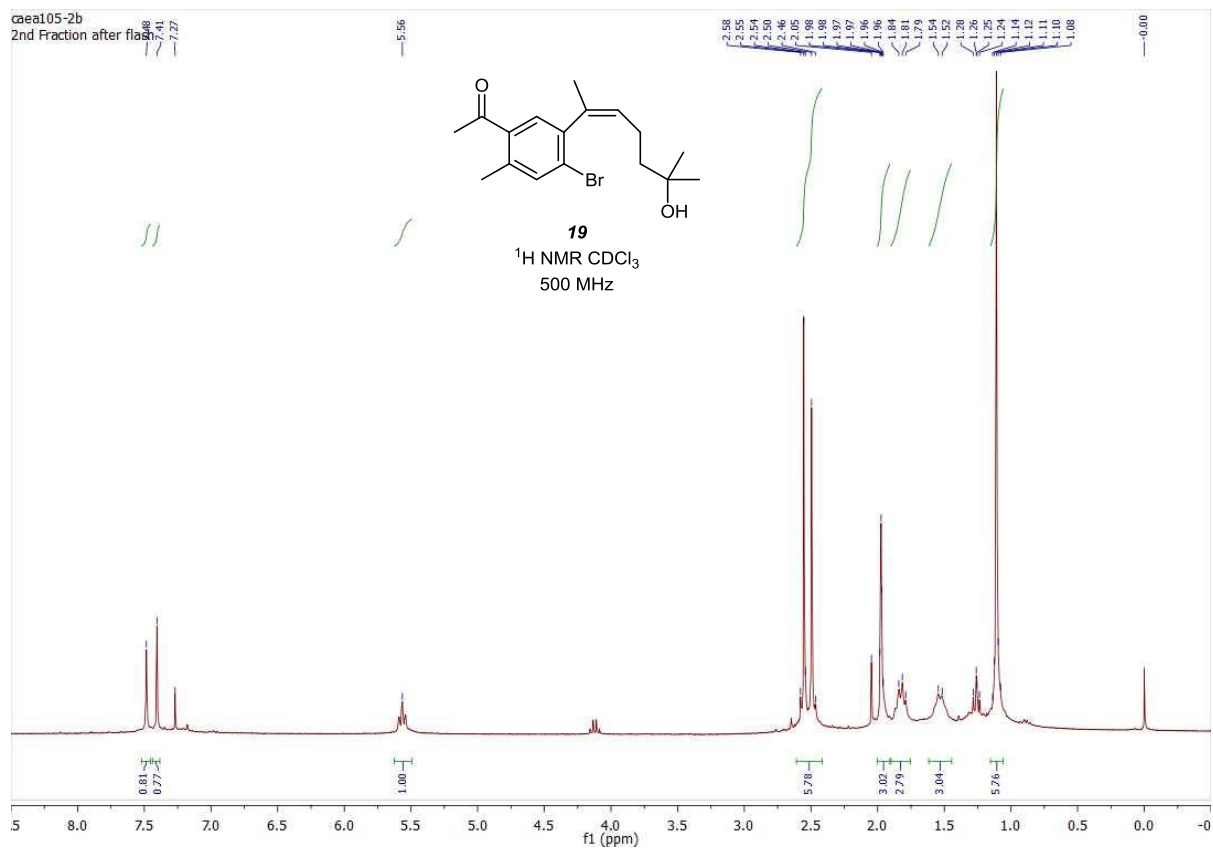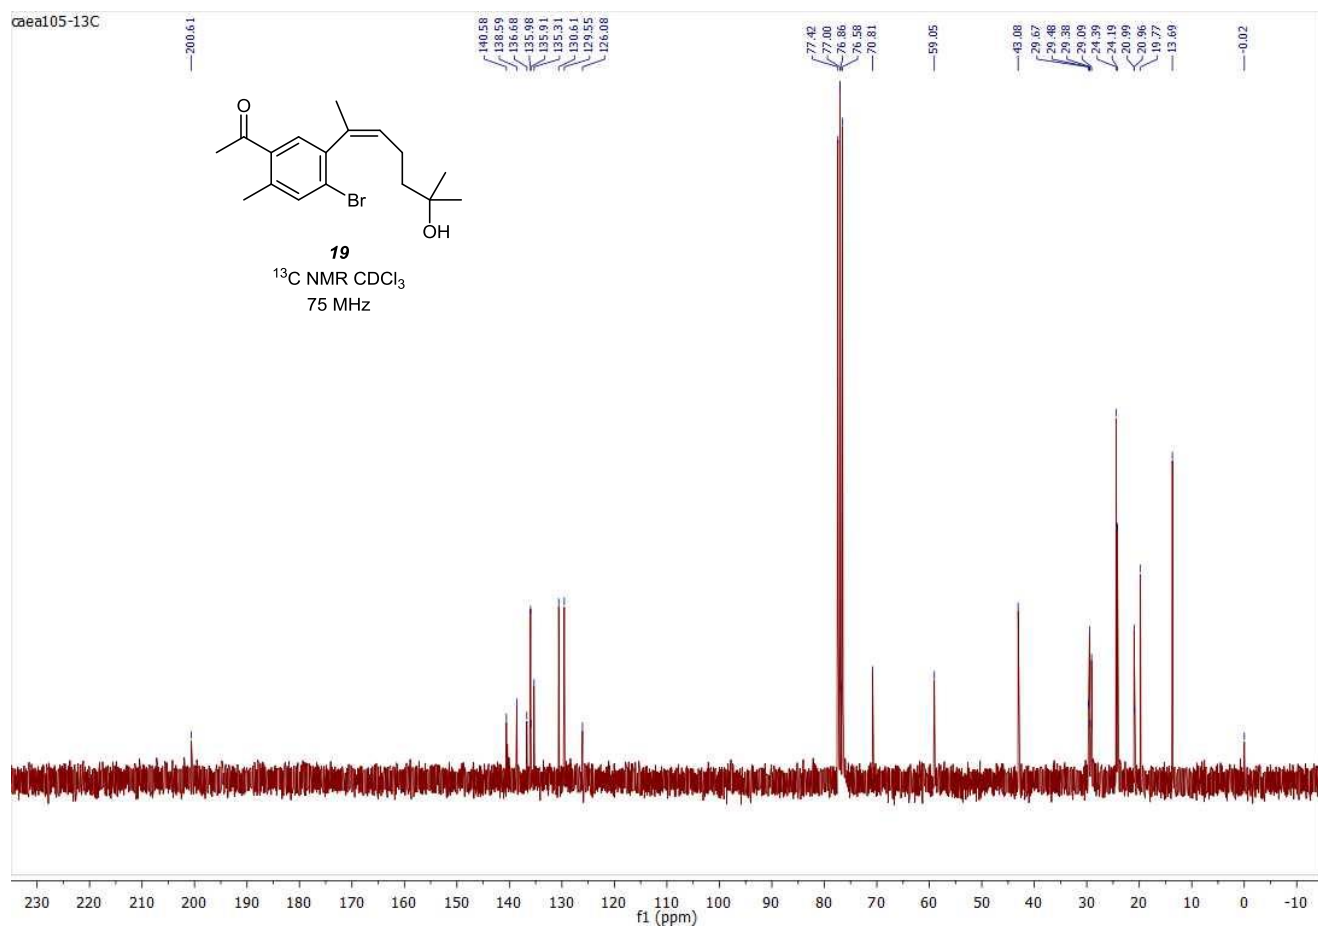

SL8058pure2X second flash product

Sample Name:  
SL8058pure2X  
Data Collected on:  
InovaNMR-inova500  
Archive directory:

Sample directory:

Fidfile: PROTON  
Pulse Sequence: PROTON  
Solvent: CDCl3  
Data collected on: 275.1 K  
Temp: 2.0 C / 275.1 K  
Operator: sbray800  
Relax. delay 1.000 sec  
Pulse 45.0 degrees  
Acq. time 2.048 sec  
Width 8000.0 Hz  
8 repetitions  
OBSERVE H1, 499.7507855 MHz  
DATA PROCESSING  
FT size 32768  
Total time 8 min 24 sec

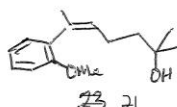

<sup>1</sup>H NMR CDCl<sub>3</sub>  
500 MHz

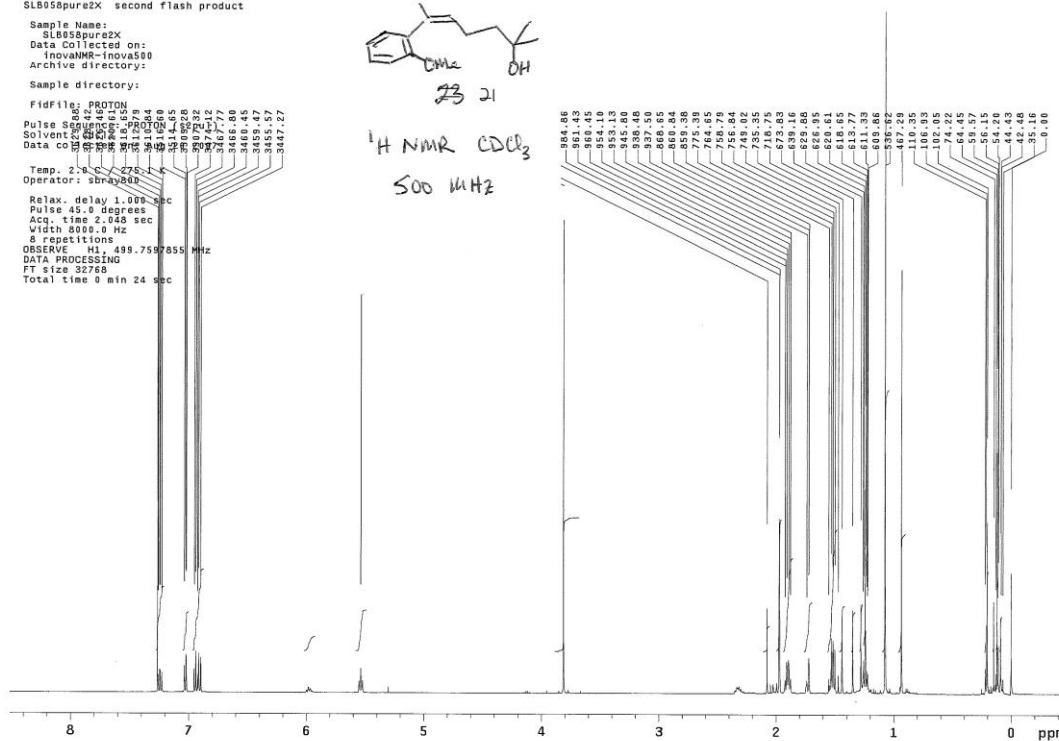

C13\_SL8058pure2X

Sample Name:  
C13\_SL8058pure2X  
Data Collected on:  
InovaNMR-inova500  
Archive directory:

Sample directory:

Fidfile: CARBON  
Pulse Sequence: CARBON (s2pul)  
Solvent: cdcl3  
Data collected on: 275.1 K  
Temp: 2.0 C / 275.1 K  
Operator: sbray800  
Relax. delay 1.000 sec  
Pulse 45.0 degrees  
Acq. time 1.042 sec  
Width 31446.5 Hz  
256 repetitions  
OBSERVE C13, 125.6647670 MHz  
DECOUPLE H1, 499.7622837 MHz  
Power 40 dB  
continuously on  
VALTZ-15 modulated  
DATA PROCESSING  
Line broadening 0.3 Hz  
FT size 65536  
Total time 8 min 45 sec

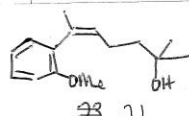

<sup>13</sup>C NMR CDCl<sub>3</sub>  
125 MHz

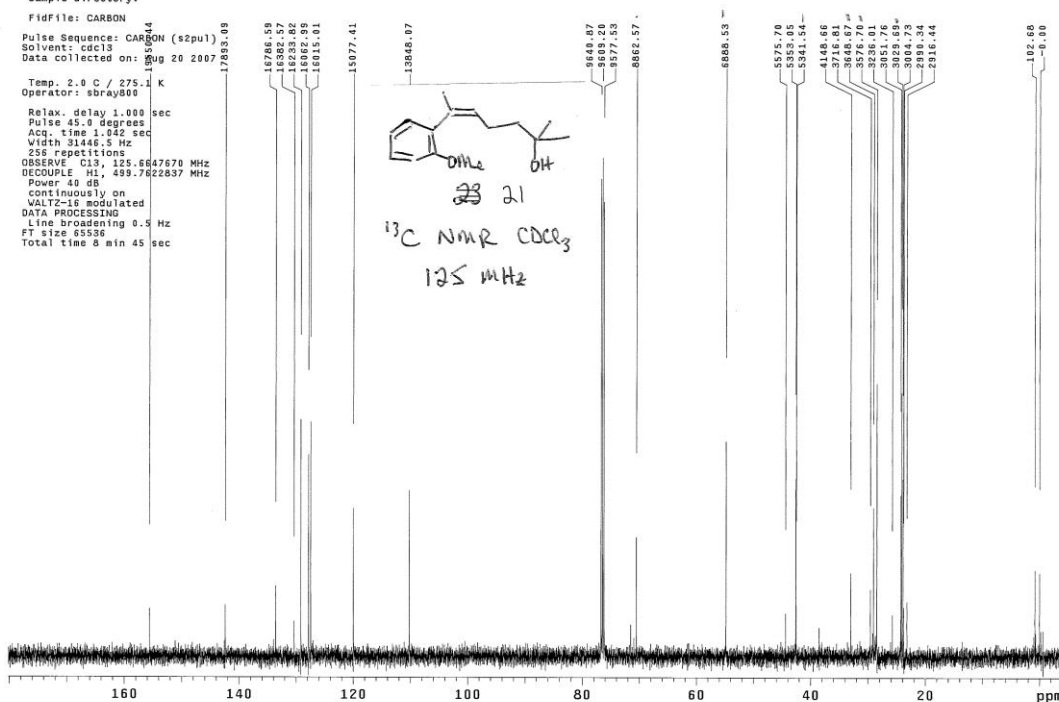

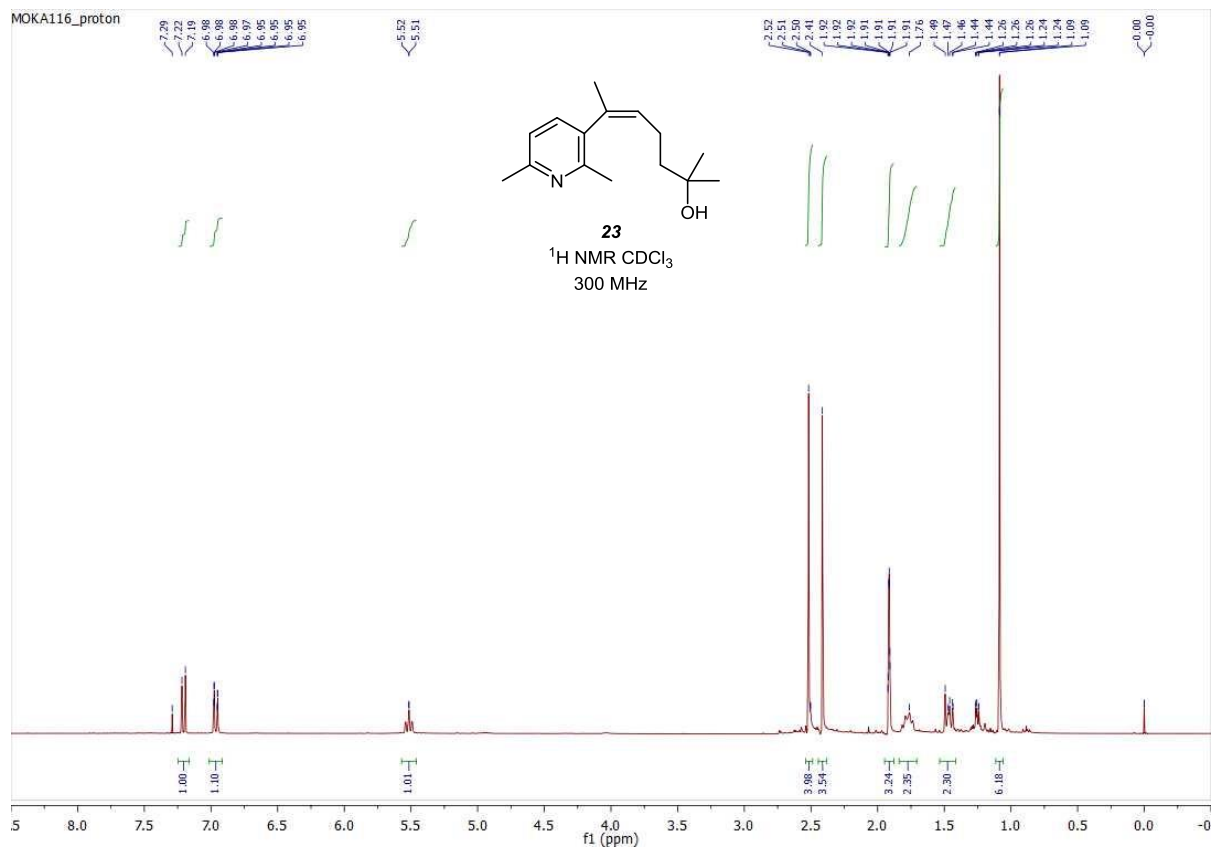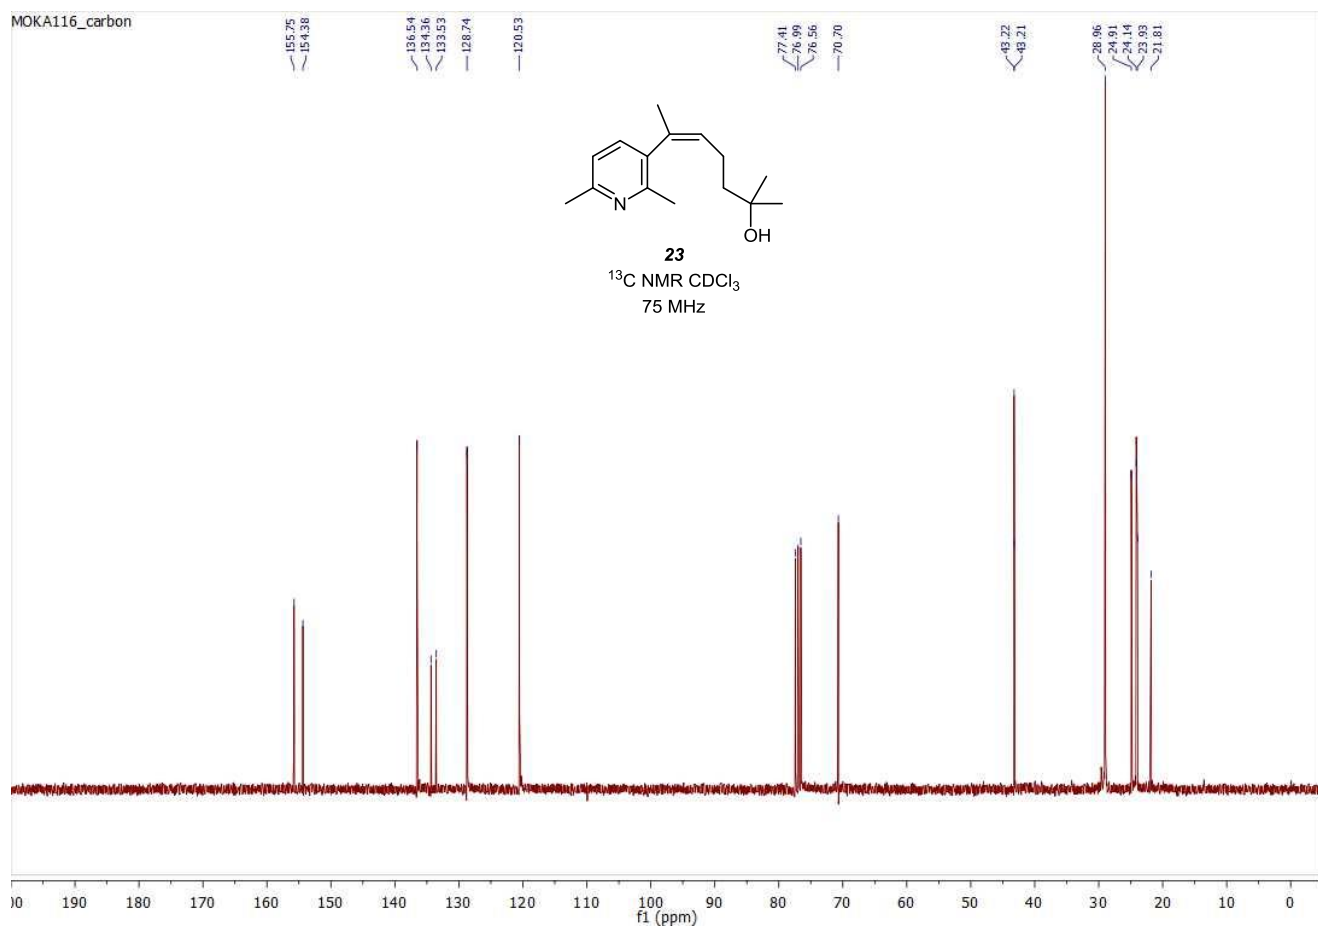



SL8136\_F1\_tube5-7

Sample Name:  
SL8136\_F1\_tube5-7  
Data Collected on:  
InovaNMR-inova500  
Archive directory:  
Sample directory:

Fidfile: PROTON

Pulse Sequence: PROTON (zgpg30)

Solvent: cdcl3

Data collected on: Aug 6 2008

Operator: sbray800

Relax. delay 1.000 sec

Pulse 45.0 degrees

Acq. time 2.048 sec

Width 8000.0 Hz

16 repetitions

OBSERVE H1, 499.7597874 MHz

DATA PROCESSING

FT size 32768

Total time 0 min 49 sec

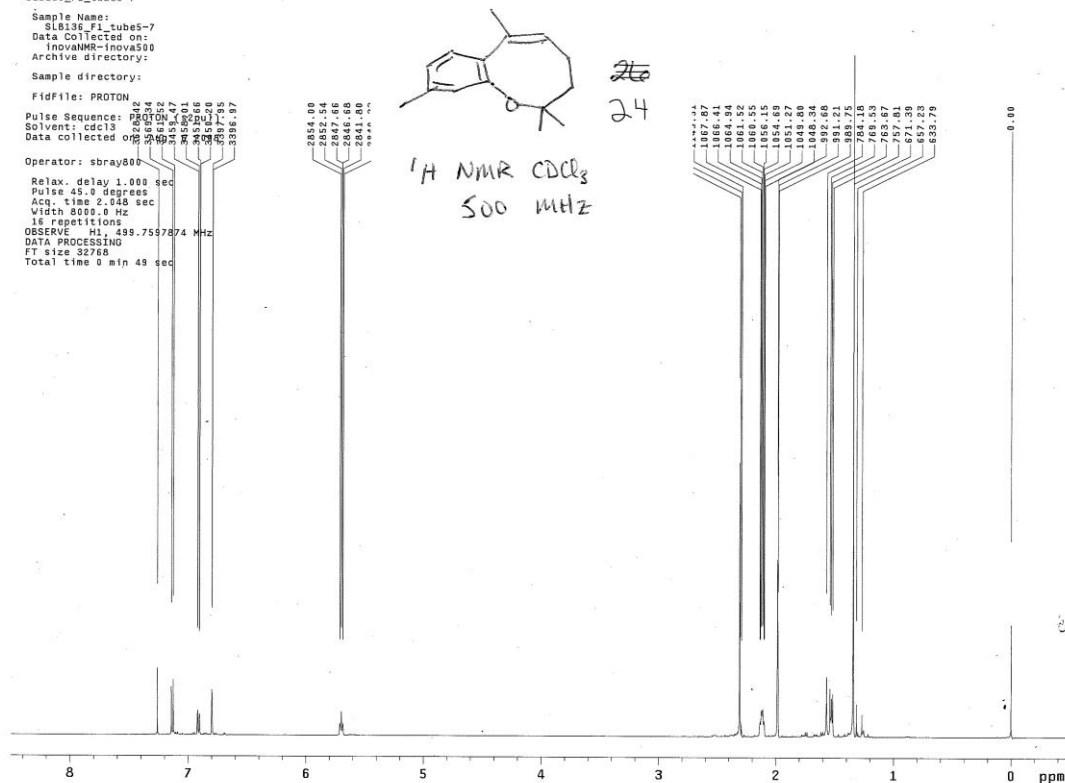

STANDARD CARBON PARAMETERS  
SL8136\_F1\_tube 5-7

Sample Name:

Data Collected on:

InovaNMR-inova500

Archive directory:

Sample directory:

Fidfile: CARBON

Pulse Sequence: CARBON (zgpg30)

Solvent: cdcl3

Data collected on: Aug 6 2008

Operator: tligo800

Relax. delay 1.000 sec

Pulse 45.0 degrees

Acq. time 1.842 sec

Width 31446.5 Hz

25500 repetitions

OBSERVE C13, 125.6646969 MHz

DECOUPLE H1, 499.7622637 MHz

Power 39 dB

continuously on

VALTZ-16 modulated

DATA PROCESSING

Line broadening 0.5 Hz

FT size 65536

Total time 15 hr, 5 min

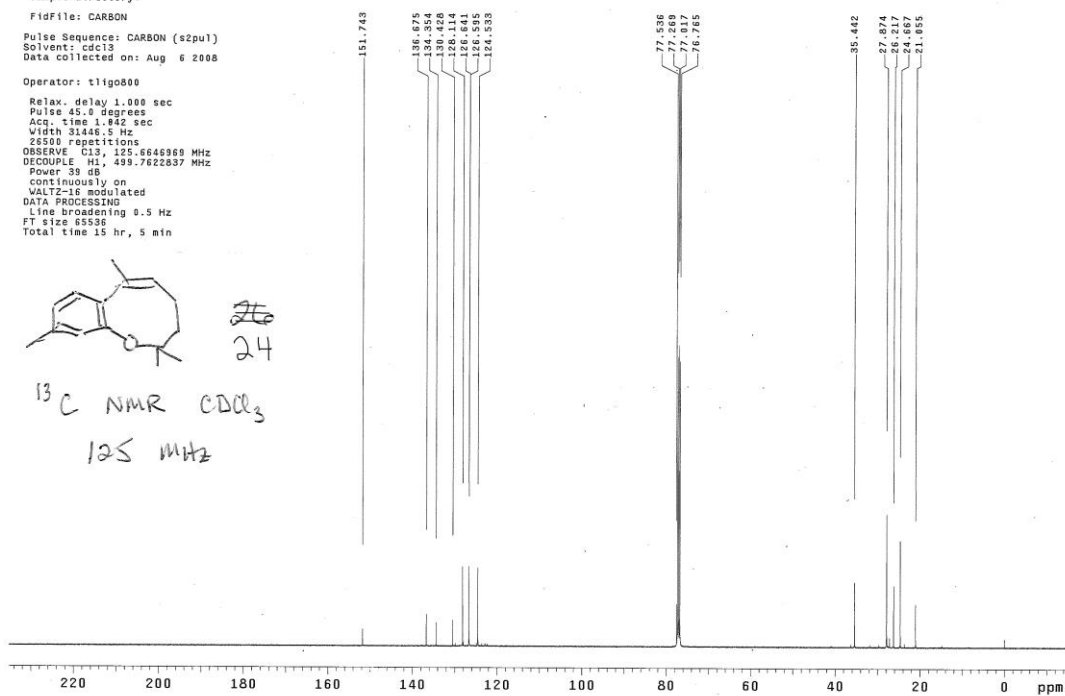

```

FileId: PROTON
Pulse Sequence: PRYAN (3-pul)
Solvent: cdcl3
Data collected on: Jul 15 2005

Operator: sb ray700

Relax. delay 1.000 sec
Pulse 45.0 deg
Acq. time 1.703 sec
Width 4810.0 Hz
8 repetitions
OBSERVE MI 300.1461904 MHz
DATA PROCESSING
FT size 16384
Total time 0 min 23 sec

```

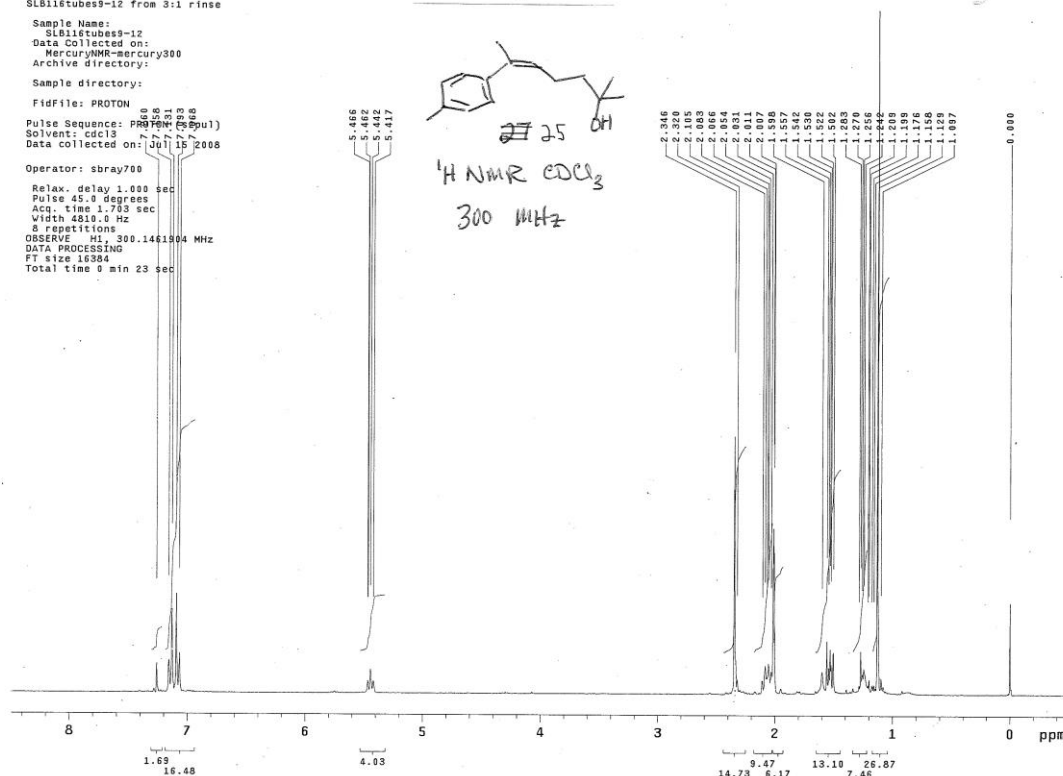

SLB116tubes9-12C13 De-brominated, from 3:1 rinse

```

Sample Name:
SLB16tubes9-12C13
Data collected on:
InovaNMR-inova500
Archive directory:
Sample directory:
FidFile: CARBON
Pulse Sequence: CARBON-13 (s2)
Solvent: cdcl3 15
Data collected on: 10062803
10062804
10062805
10062806
10062807
10062808
10062809
10062810
10062811
10062812
10062813
10062814
10062815
10062816
10062817
10062818
10062819
10062820
10062821
10062822
10062823
10062824
10062825
10062826
10062827
10062828
10062829
10062830
10062831
10062832
10062833
10062834
10062835
10062836
10062837
10062838
10062839
10062840
10062841
10062842
10062843
10062844
10062845
10062846
10062847
10062848
10062849
10062850
10062851
10062852
10062853
10062854
10062855
10062856
10062857
10062858
10062859
10062860
10062861
10062862
10062863
10062864
10062865
10062866
10062867
10062868
10062869
10062870
10062871
10062872
10062873
10062874
10062875
10062876
10062877
10062878
10062879
10062880
10062881
10062882
10062883
10062884
10062885
10062886
10062887
10062888
10062889
10062890
10062891
10062892
10062893
10062894
10062895
10062896
10062897
10062898
10062899
10062900
10062901
10062902
10062903
10062904
10062905
10062906
10062907
10062908
10062909
10062910
10062911
10062912
10062913
10062914
10062915
10062916
10062917
10062918
10062919
10062920
10062921
10062922
10062923
10062924
10062925
10062926
10062927
10062928
10062929
10062930
10062931
10062932
10062933
10062934
10062935
10062936
10062937
10062938
10062939
10062940
10062941
10062942
10062943
10062944
10062945
10062946
10062947
10062948
10062949
10062950
10062951
10062952
10062953
10062954
10062955
10062956
10062957
10062958
10062959
10062960
10062961
10062962
10062963
10062964
10062965
10062966
10062967
10062968
10062969
10062970
10062971
10062972
10062973
10062974
10062975
10062976
10062977
10062978
10062979
10062980
10062981
10062982
10062983
10062984
10062985
10062986
10062987
10062988
10062989
10062990
10062991
10062992
10062993
10062994
10062995
10062996
10062997
10062998
10062999
10063000
10063001
10063002
10063003
10063004
10063005
10063006
10063007
10063008
10063009
10063010
10063011
10063012
10063013
10063014
10063015
10063016
10063017
10063018
10063019
10063020
10063021
10063022
10063023
10063024
10063025
10063026
10063027
10063028
10063029
10063030
10063031
10063032
10063033
10063034
10063035
10063036
10063037
10063038
10063039
10063040
10063041
10063042
10063043
10063044
10063045
10063046
10063047
10063048
10063049
10063050
10063051
10063052
10063053
10063054
10063055
10063056
10063057
10063058
10063059
10063060
10063061
10063062
10063063
10063064
10063065
10063066
10063067
10063068
10063069
10063070
10063071
10063072
10063073
10063074
10063075
10063076
10063077
10063078
10063079
10063080
10063081
10063082
10063083
10063084
10063085
10063086
10063087
10063088
10063089
10063090
10063091
10063092
10063093
10063094
10063095
10063096
10063097
10063098
10063099
10063100
10063101
10063102
10063103
10063104
10063105
10063106
10063107
10063108
10063109
10063110
10063111
10063112
10063113
10063114
10063115
10063116
10063117
10063118
10063119
10063120
10063121
10063122
10063123
10063124
10063125
10063126
10063127
10063128
10063129
10063130
10063131
10063132
10063133
10063134
10063135
10063136
10063137
10063138
10063139
10063140
10063141
10063142
10063143
10063144
10063145
10063146
10063147
10063148
10063149
10063150
10063151
10063152
10063153
10063154
10063155
10063156
10063157
10063158
10063159
10063160
10063161
10063162
10063163
10063164
10063165
10063166
10063167
10063168
10063169
10063170
10063171
10063172
10063173
10063174
10063175
10063176
10063177
10063178
10063179
10063180
10063181
10063182
10063183
10063184
10063185
10063186
10063187
10063188
10063189
10063190
10063191
10063192
10063193
10063194
10063195
10063196
10063197
10063198
10063199
10063200
10063201
10063202
10063203
10063204
10063205
10063206
10063207
10063208
10063209
10063210
10063211
10063212
10063213
10063214
10063215
10063216
10063217
10063218
10063219
10063220
10063221
10063222
10063223
10063224
10063225
10063226
10063227
10063228
10063229
10063230
10063231
10063232
10063233
10063234
10063235
10063236
10063237
10063238
10063239
10063240
10063241
10063242
10063243
10063244
10063245
10063246
10063247
10063248

```

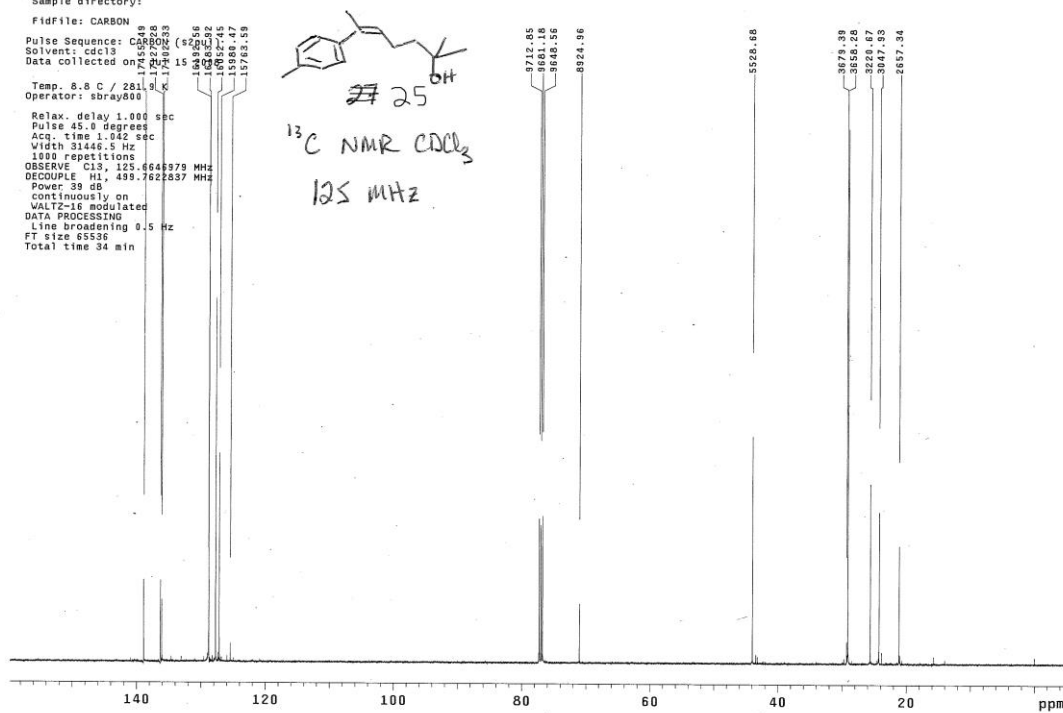

SLB6036tube5-7

Sample Name:  
SLB6036tube5-7  
Data Collected on:  
inovaNMR-inova500  
Archive directory:

Sample directory:  
FidFile: PROTON

Pulse Sequence: PROTON (s2pu1)  
Solvent: cdcl3  
Data collected on: Feb 5 2009

Temp. 20.0 C / 293.1 K  
Operator: sbray800

Relax. delay 1.000 sec  
Pulse 45.0 degrees  
Acq. time 2.048 sec  
Width 8000.0 Hz  
16 repetitions  
OBSERVE H1, 499.7497394 MHz  
DATA PROCESSING  
FT size 32768  
Total time 0 min 49 sec

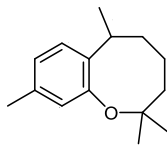

26

<sup>1</sup>H NMR CDCl<sub>3</sub>  
500 MHz

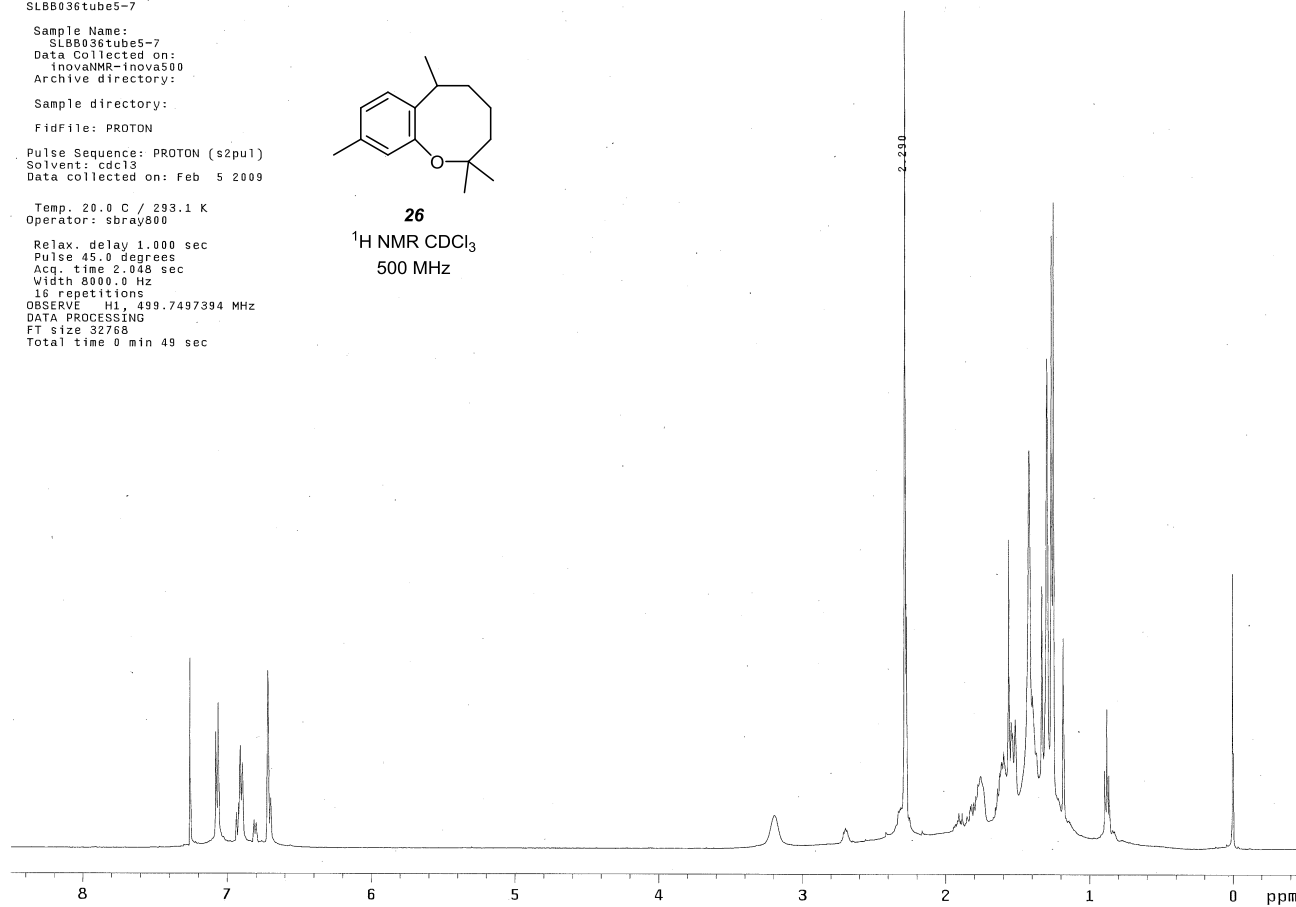

Supplement: Additional file 1 [file 1860-5397-13-209-S1.pdf]
